# Supplementary material for: Synthesis of tetrahydroquinazolines from 2-aminobenzonitriles and alkylidene malonates via 1,4-conjugate addition and an unprecedented rearrangement reaction
Source: Royal Society of Chemistry journal article supplement (doi:10.1039/d4cc00240g), 2024-01-01

## Supporting Information for Review

### Synthesis of tetrahydroquinazolines from 2-aminobenzonitriles and alkylidene malonates via 1,4-conjugate addition and unprecedented rearrangement reaction

Bikoshita Porashar, Bipin Kumar Behera, Hunmoina Phukan and Anil K. Saikia\*

Department of Chemistry, Indian Institute of Technology Guwahati, Guwahati-781039,  
Assam, India

e-mail: [asaikia@iitg.ac.in](mailto:asaikia@iitg.ac.in)

#### Table of Contents:

|                                      |        |
|--------------------------------------|--------|
| 1. HRMS spectra of all new compounds | S2-S35 |
|--------------------------------------|--------|

# HRMS spectrum of compound **3aa**

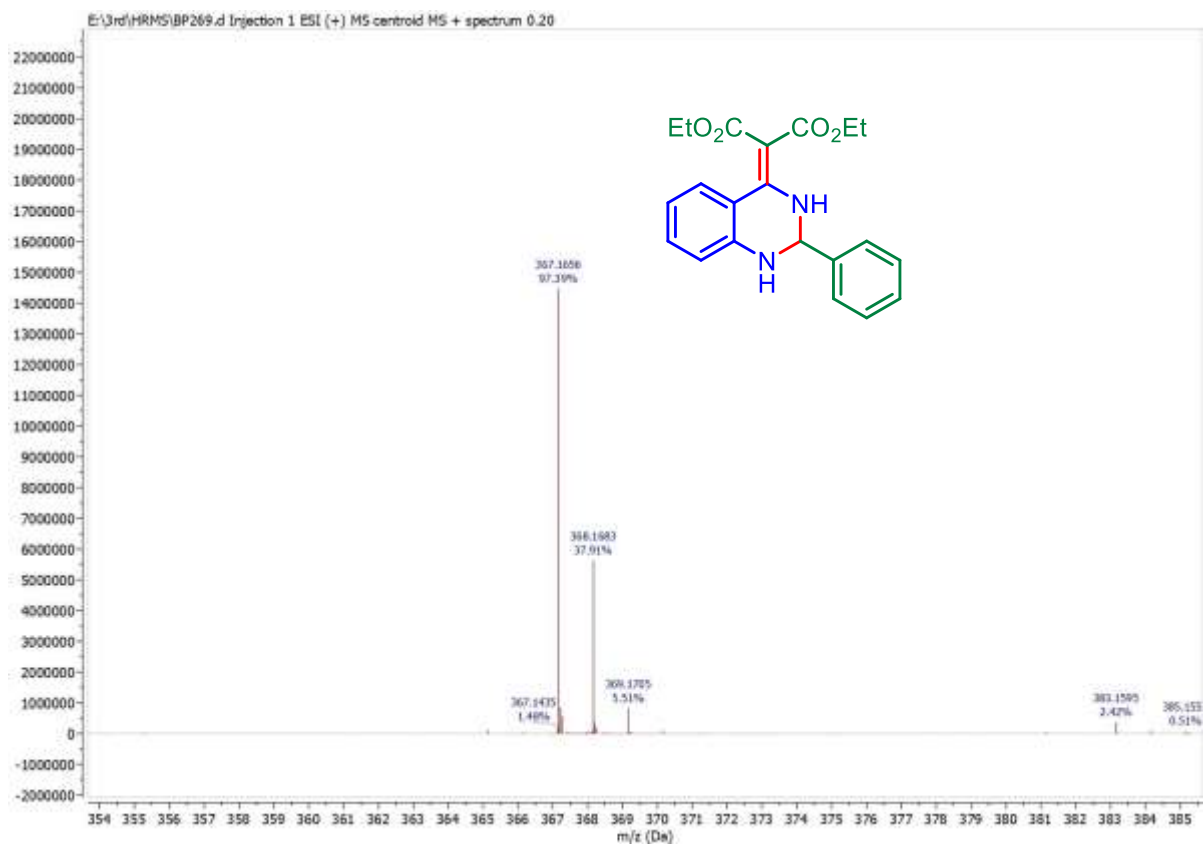

# HRMS spectrum of compound **3ab**

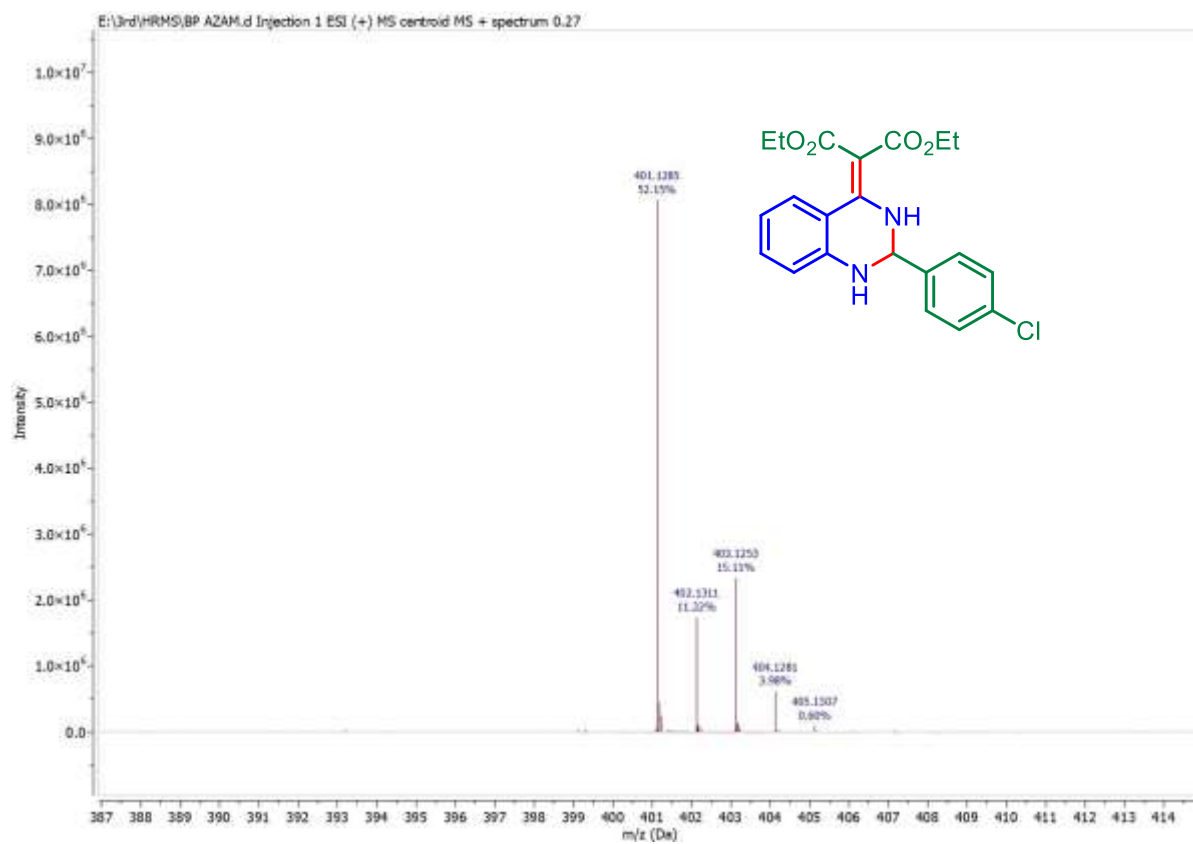

# HRMS spectrum of compound **3ac**

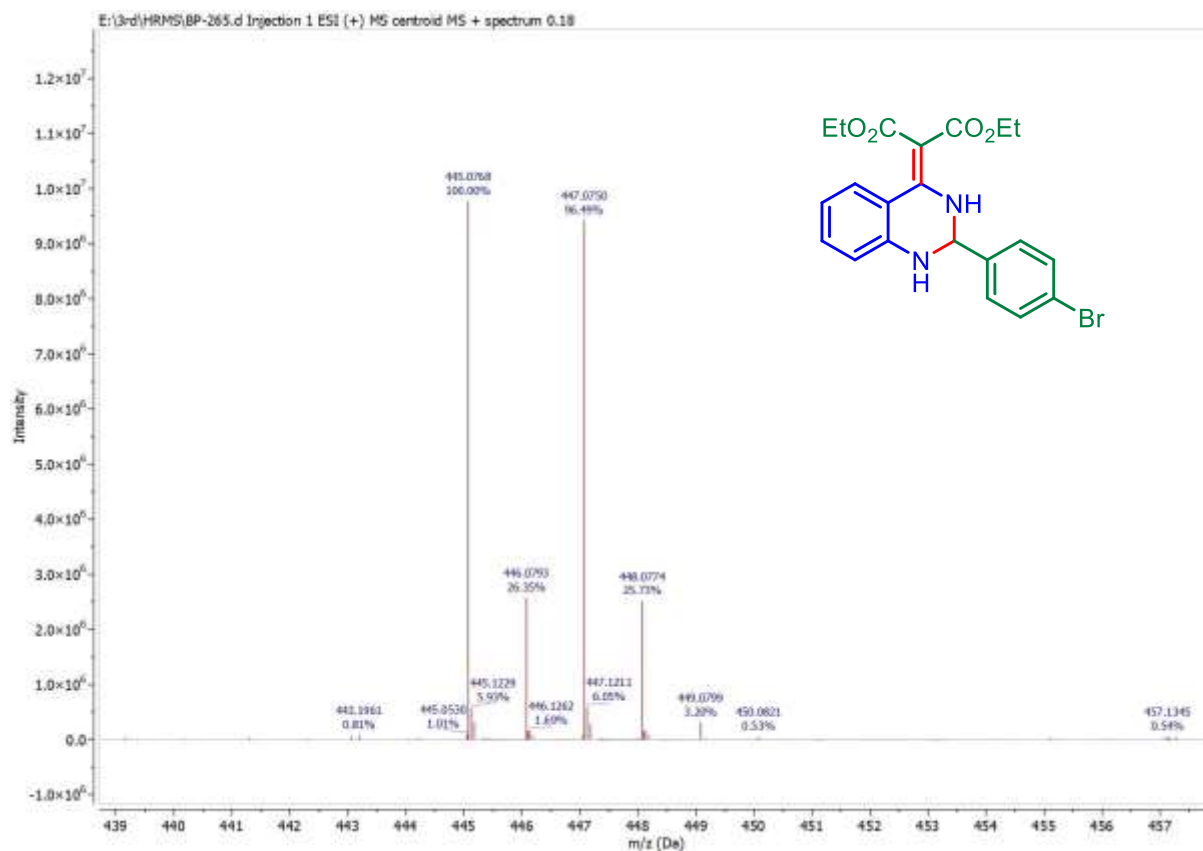

# HRMS spectrum of compound **3ad**

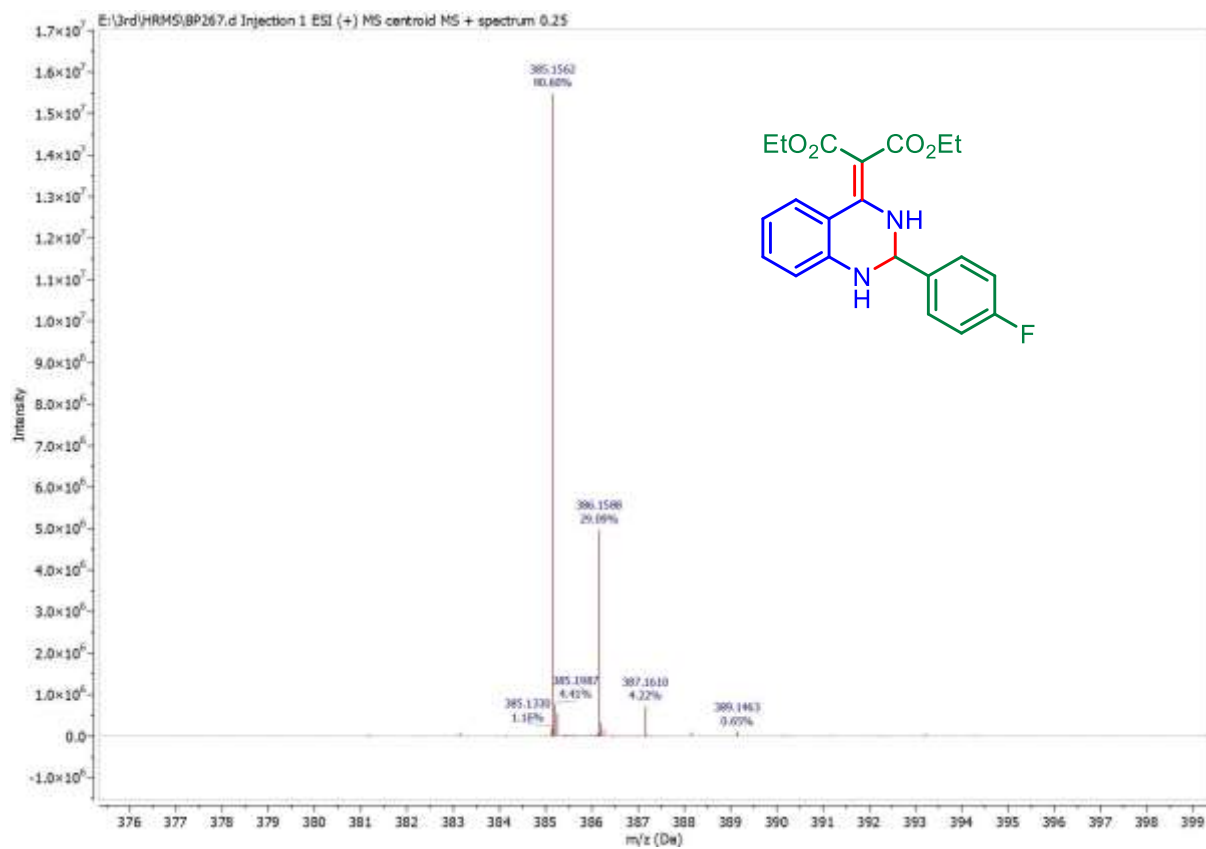

### HRMS spectrum of compound **3ae**

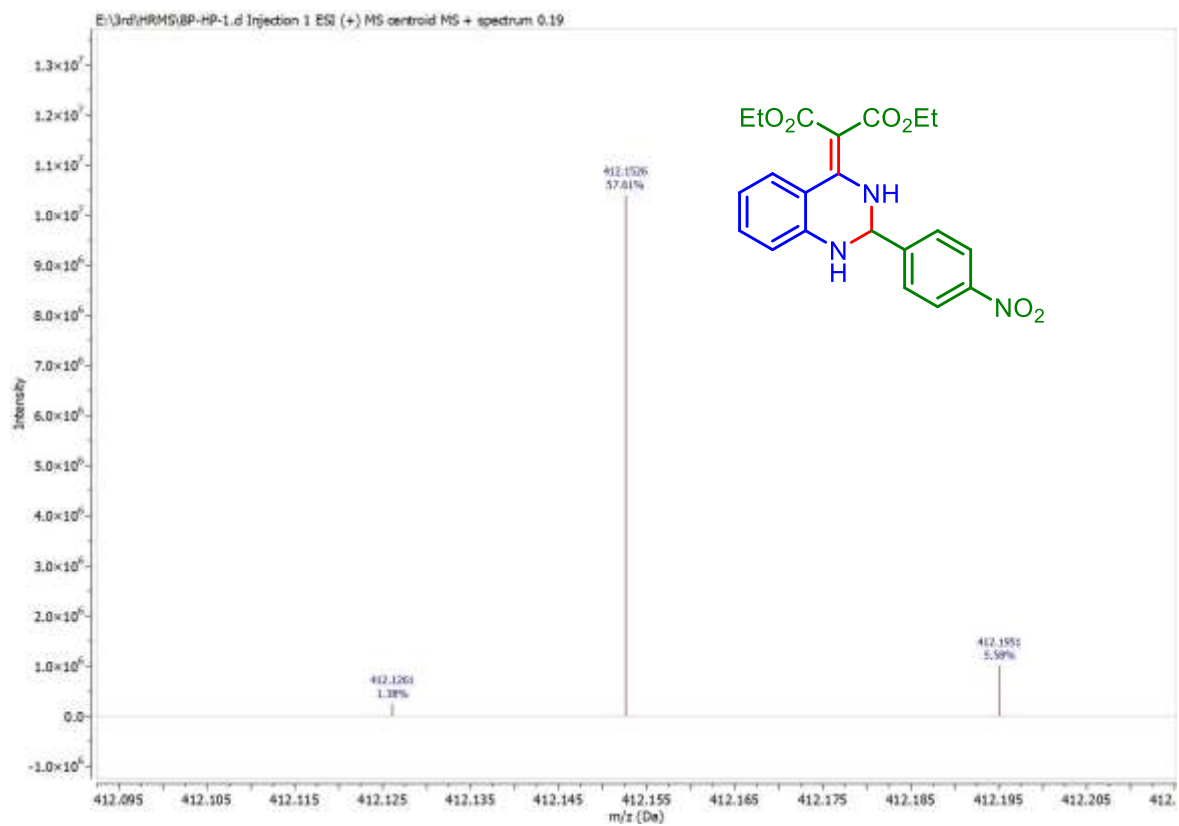

# HRMS spectrum of compound **3af**

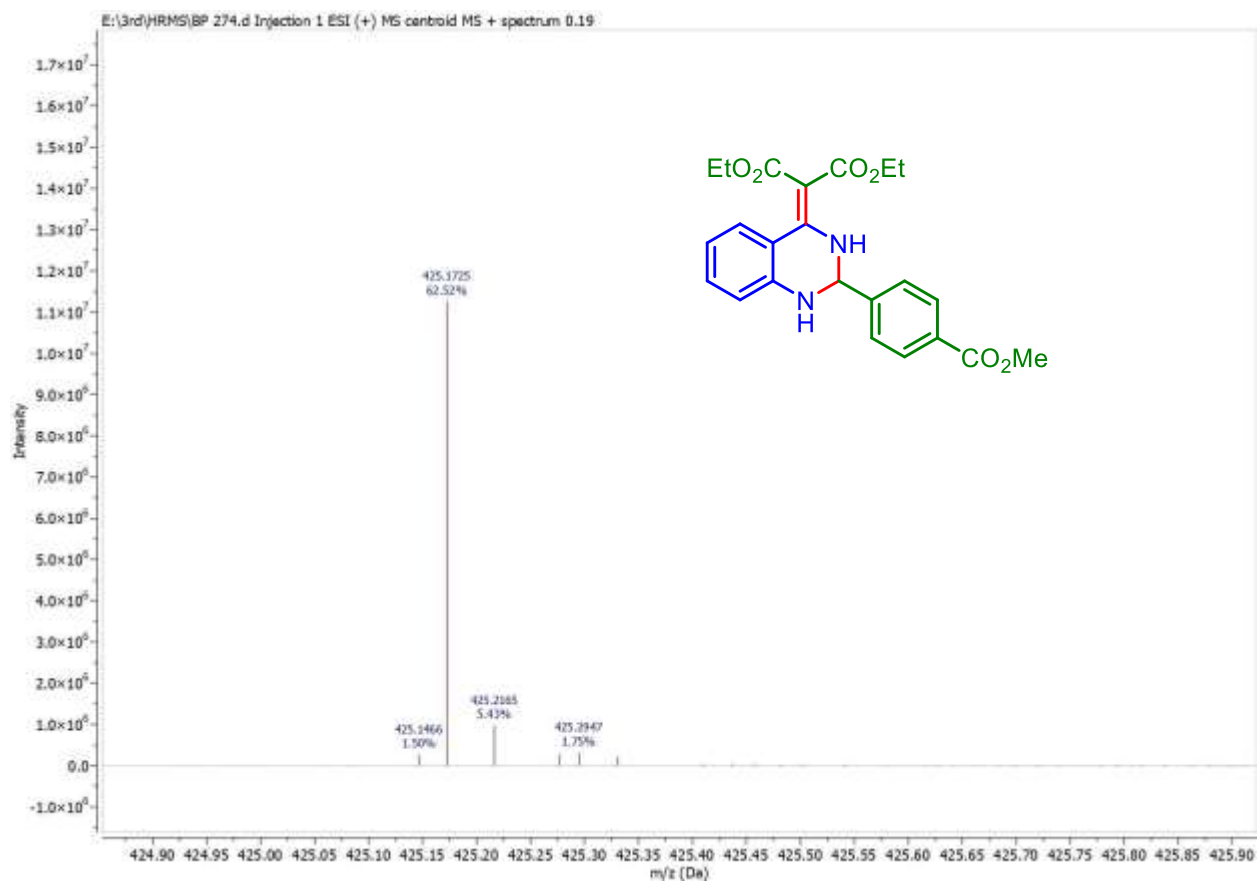

# HRMS spectrum of compound **3ag**

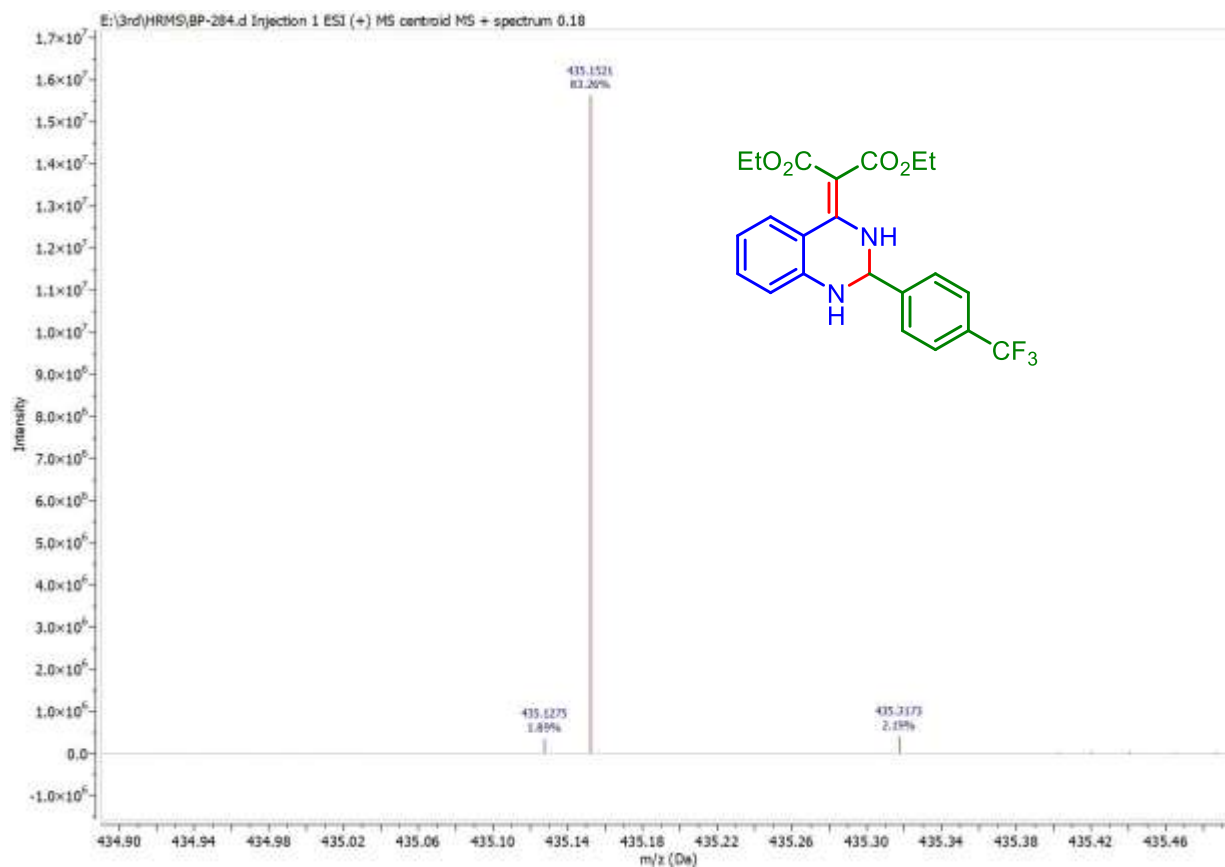



# HRMS spectrum of compound **3ah**

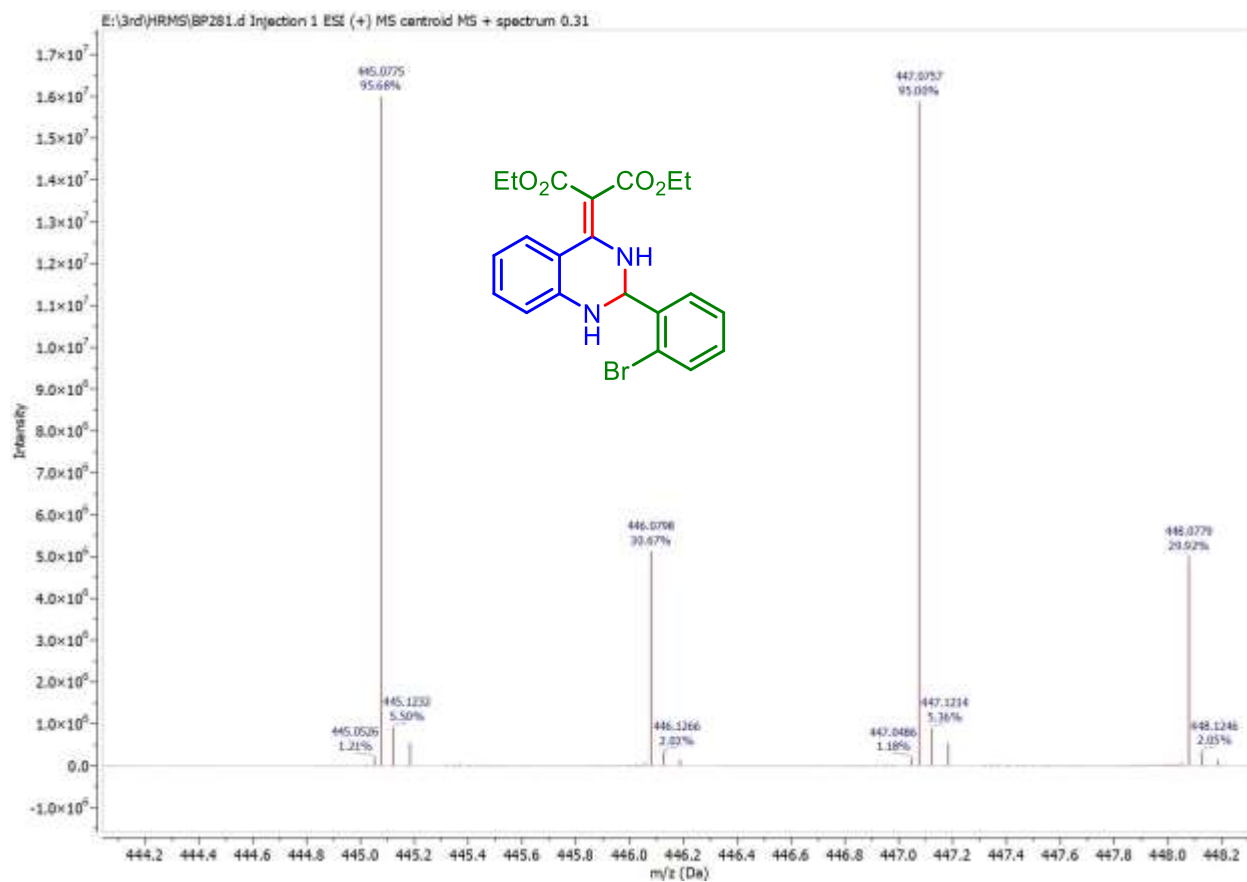

# HRMS spectrum of compound **3ai**

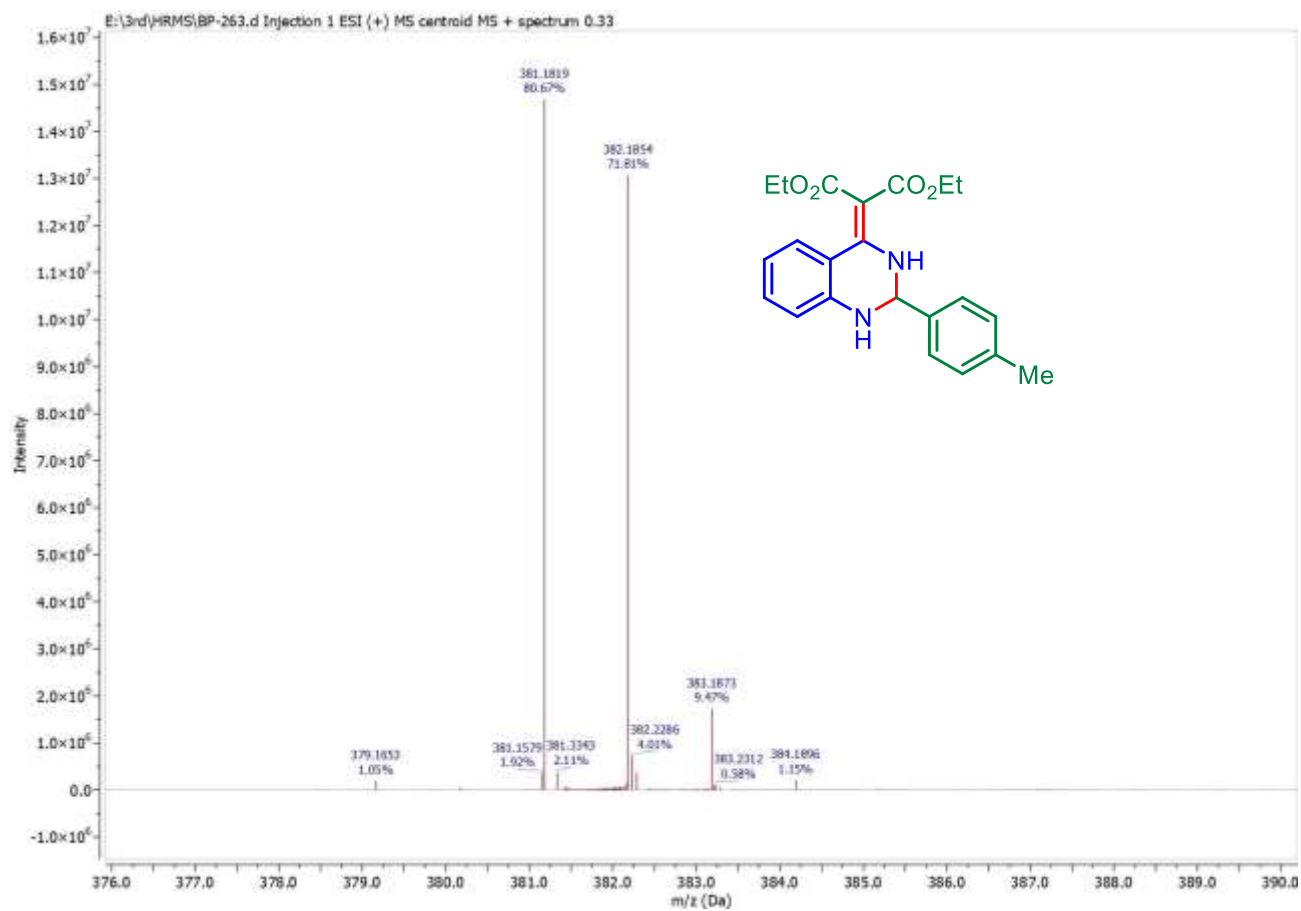

# HRMS spectrum of compound **3aj**

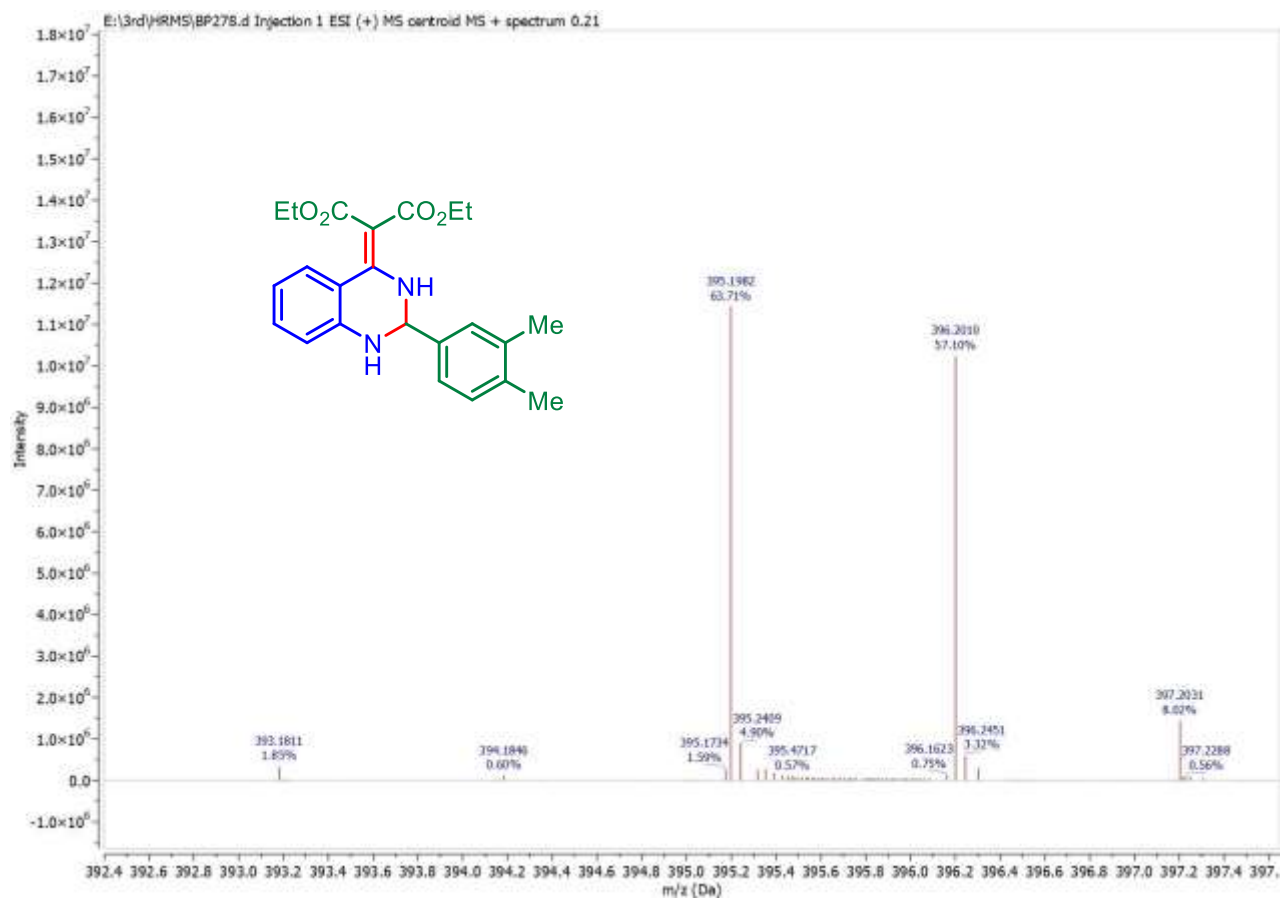

# HRMS spectrum of compound **3ak**

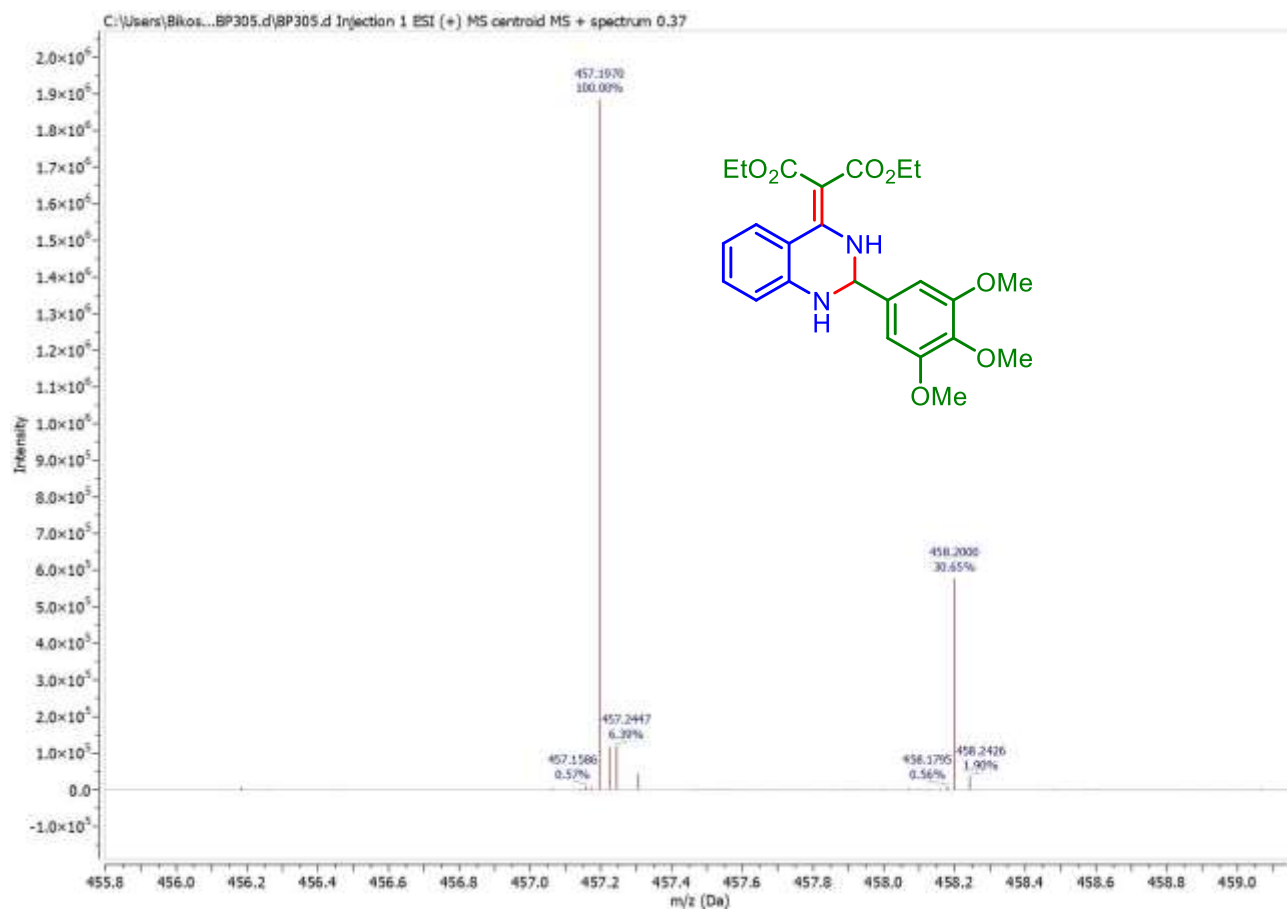

# HRMS spectrum of compound **3al**

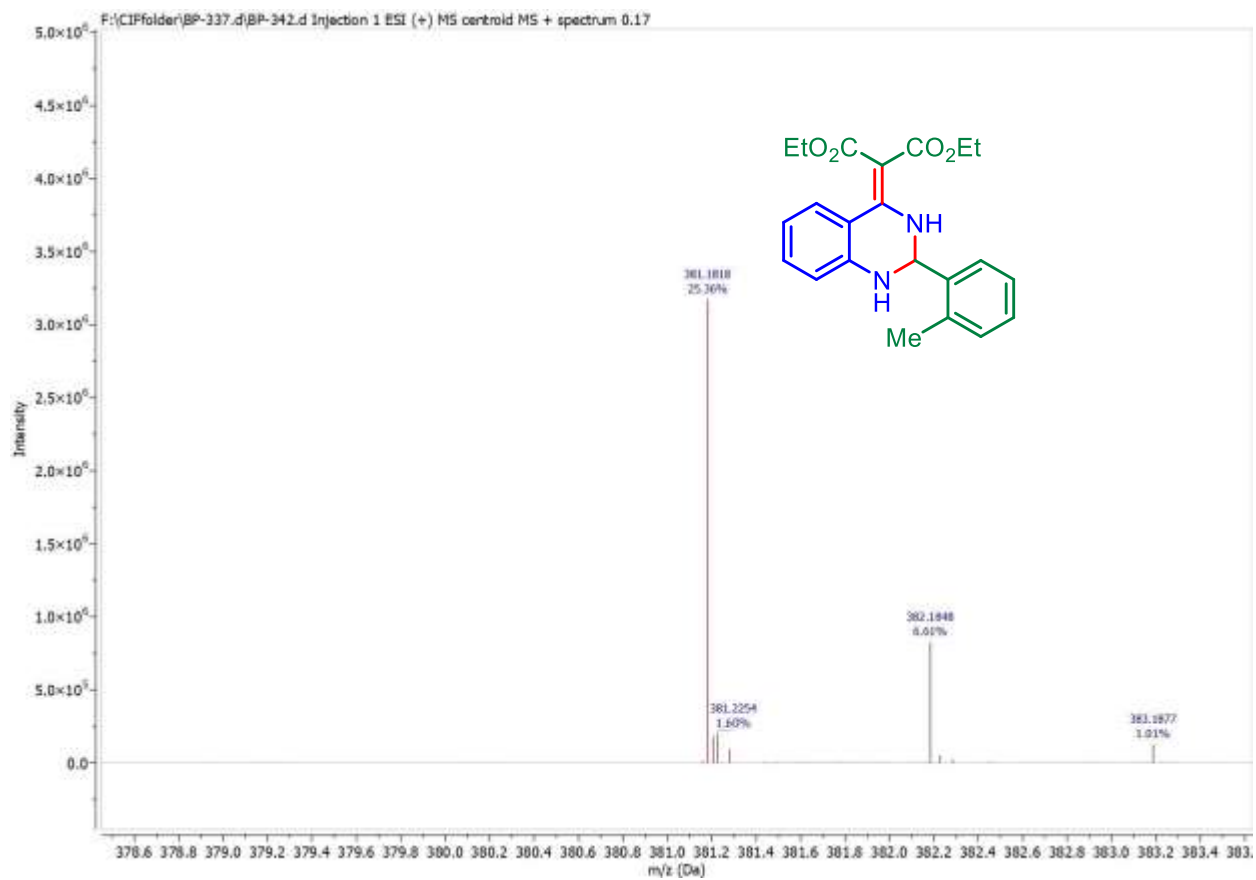

# HRMS spectrum of compound **3am**

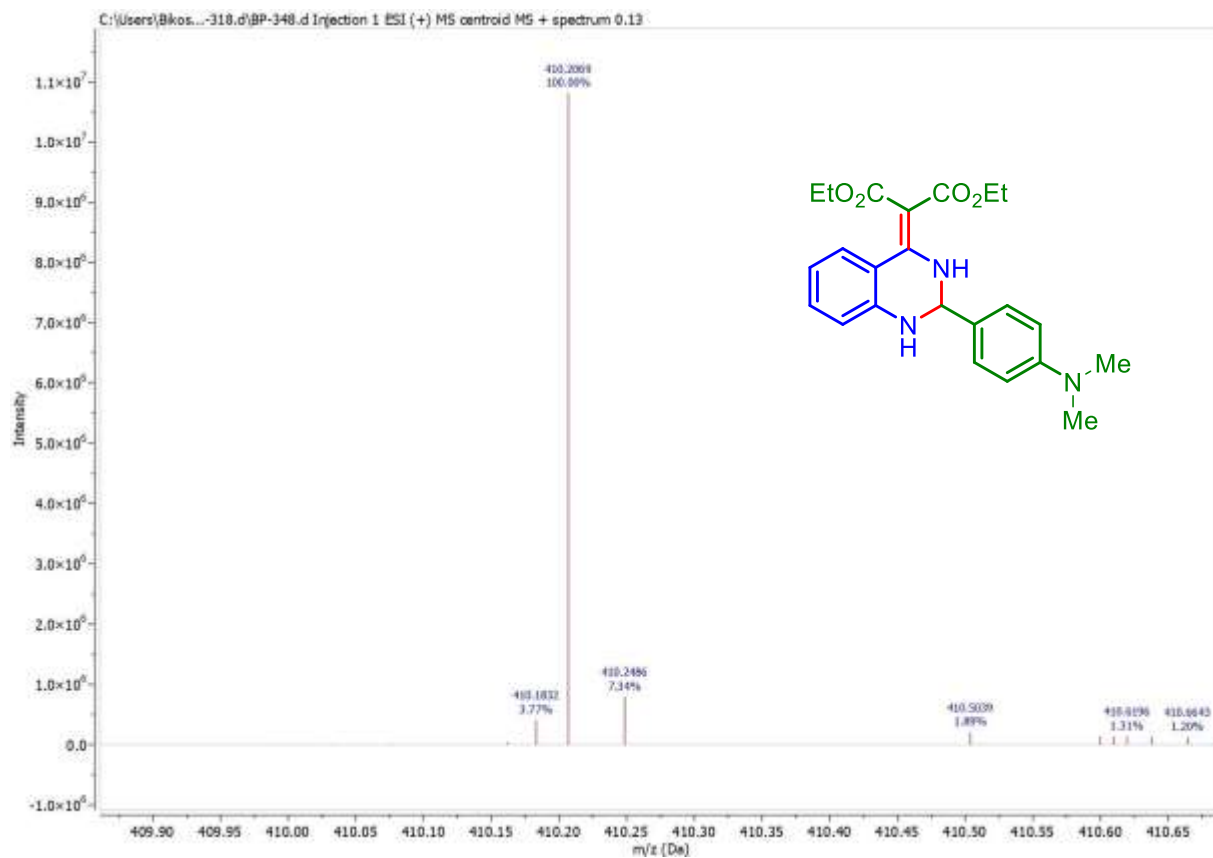

# HRMS spectrum of compound **3an**

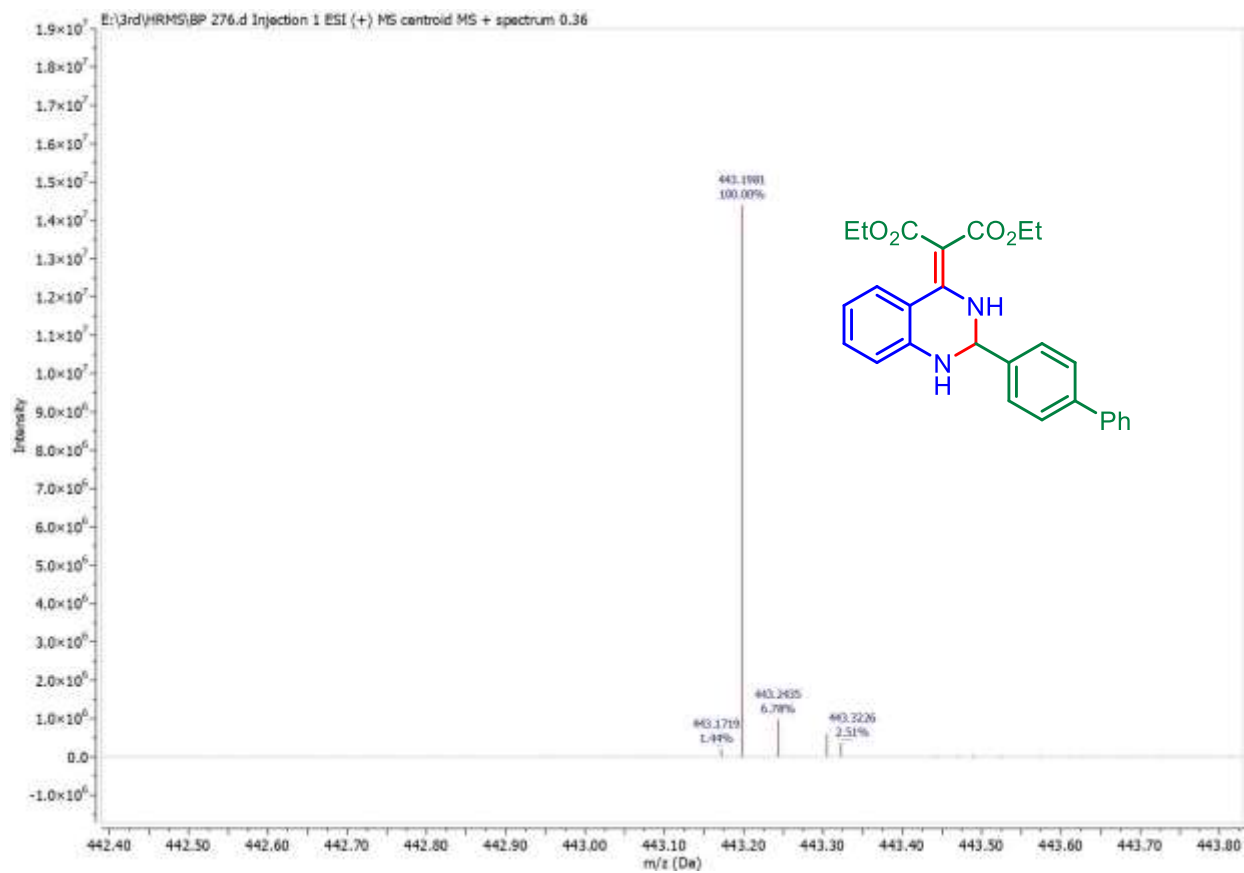

# HRMS spectrum of compound **3ao**

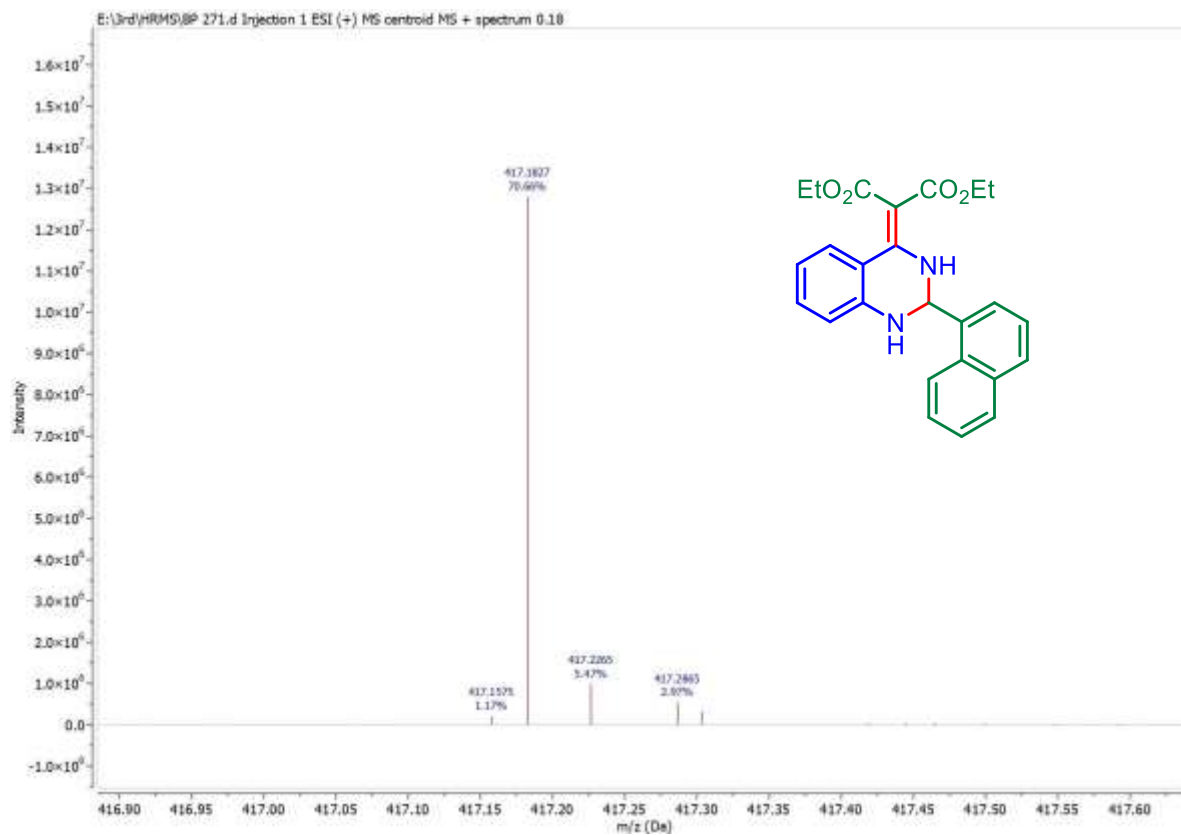



# HRMS spectrum of compound **3ap**

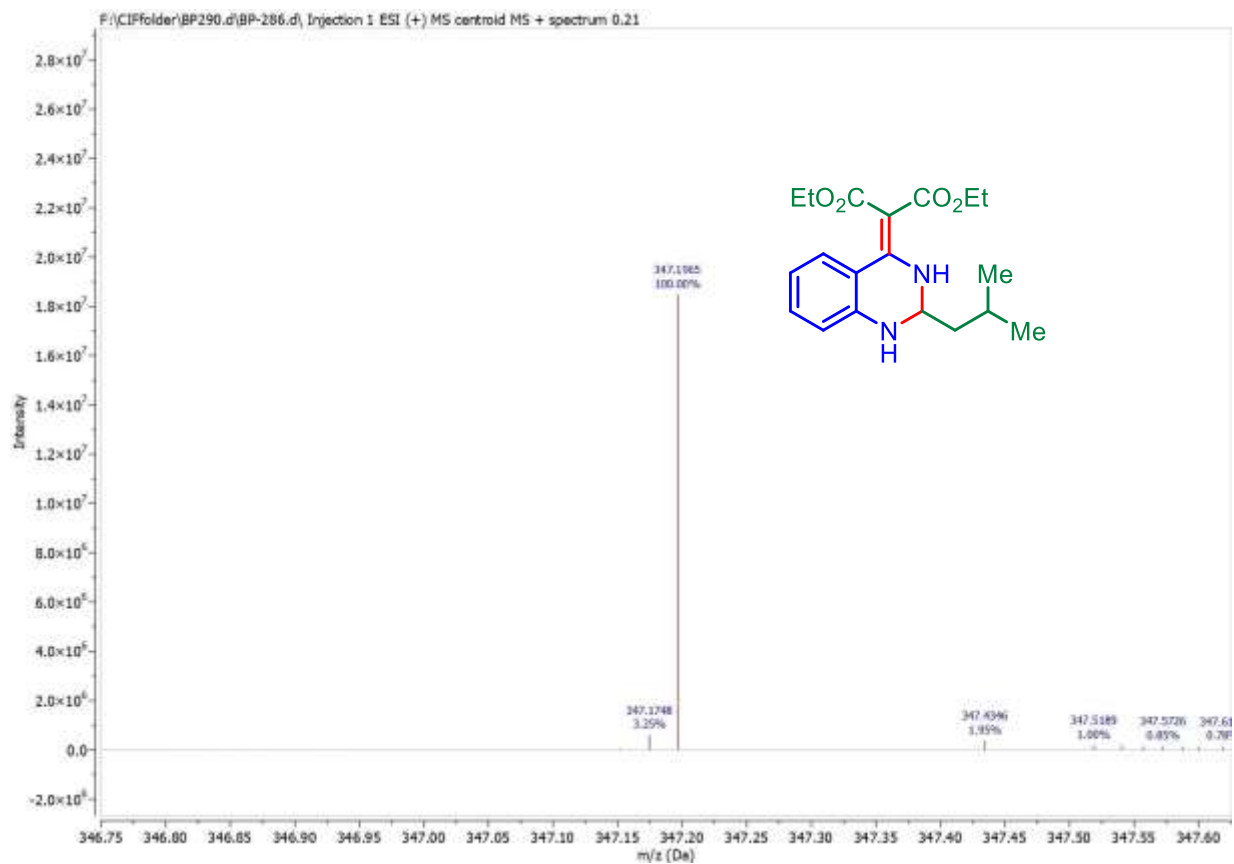

# HRMS spectrum of compound **3aq**

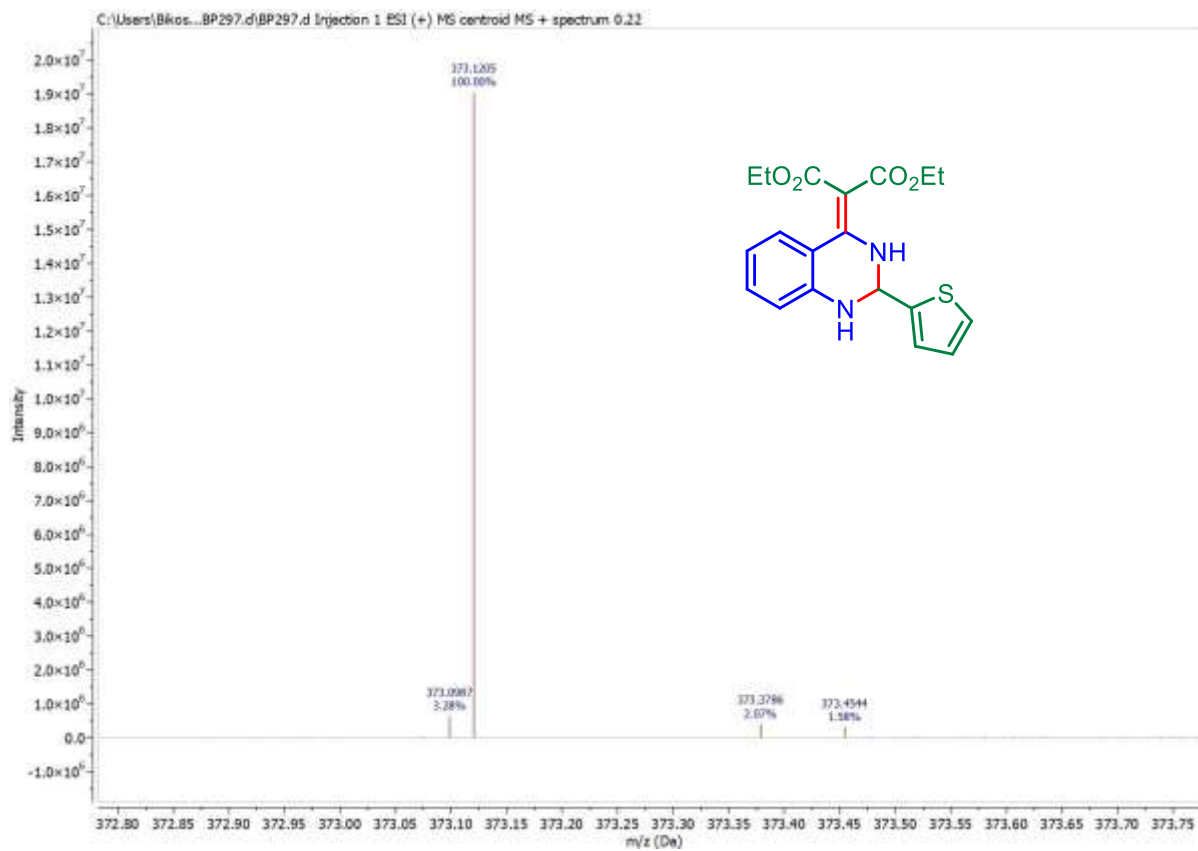

## HRMS spectrum of compound **3ar**

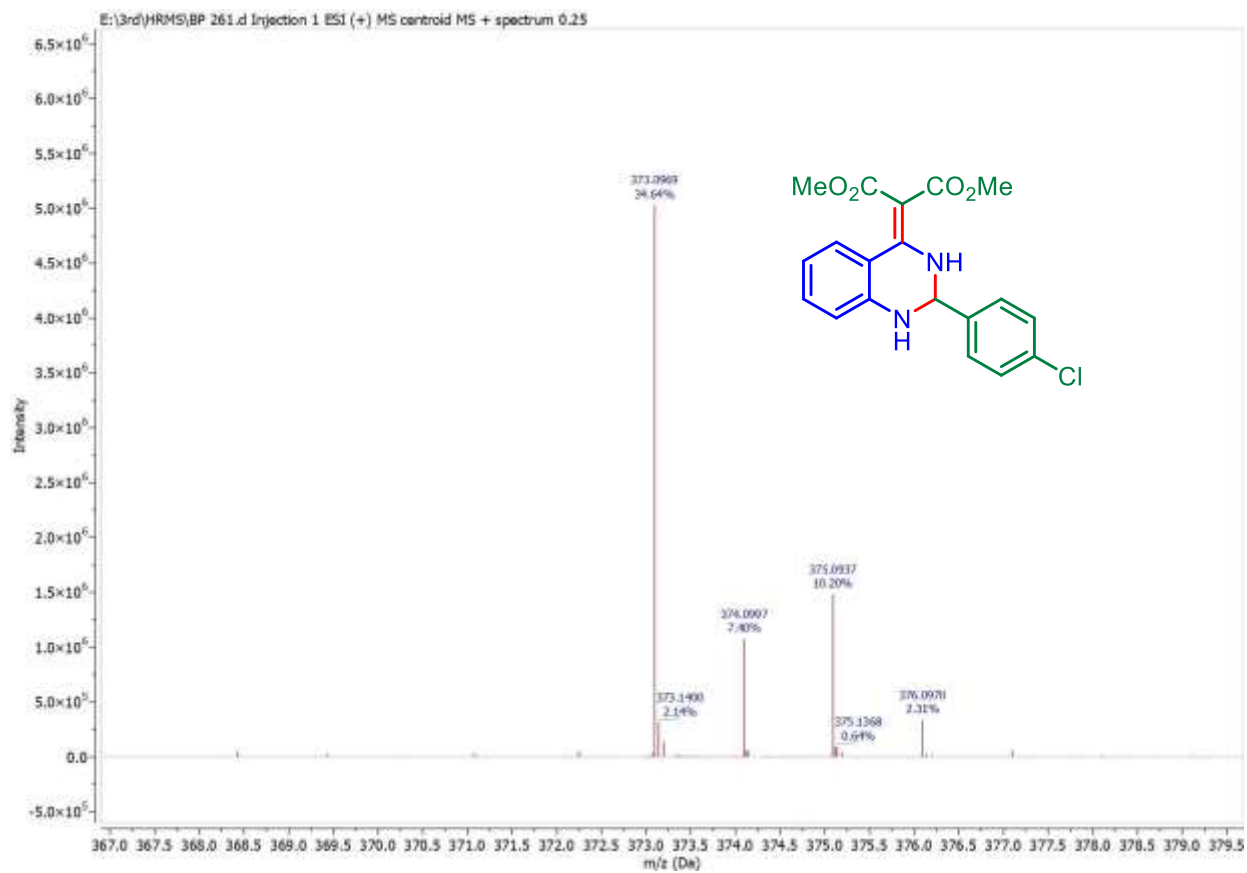

# HRMS spectrum of compound **3as**

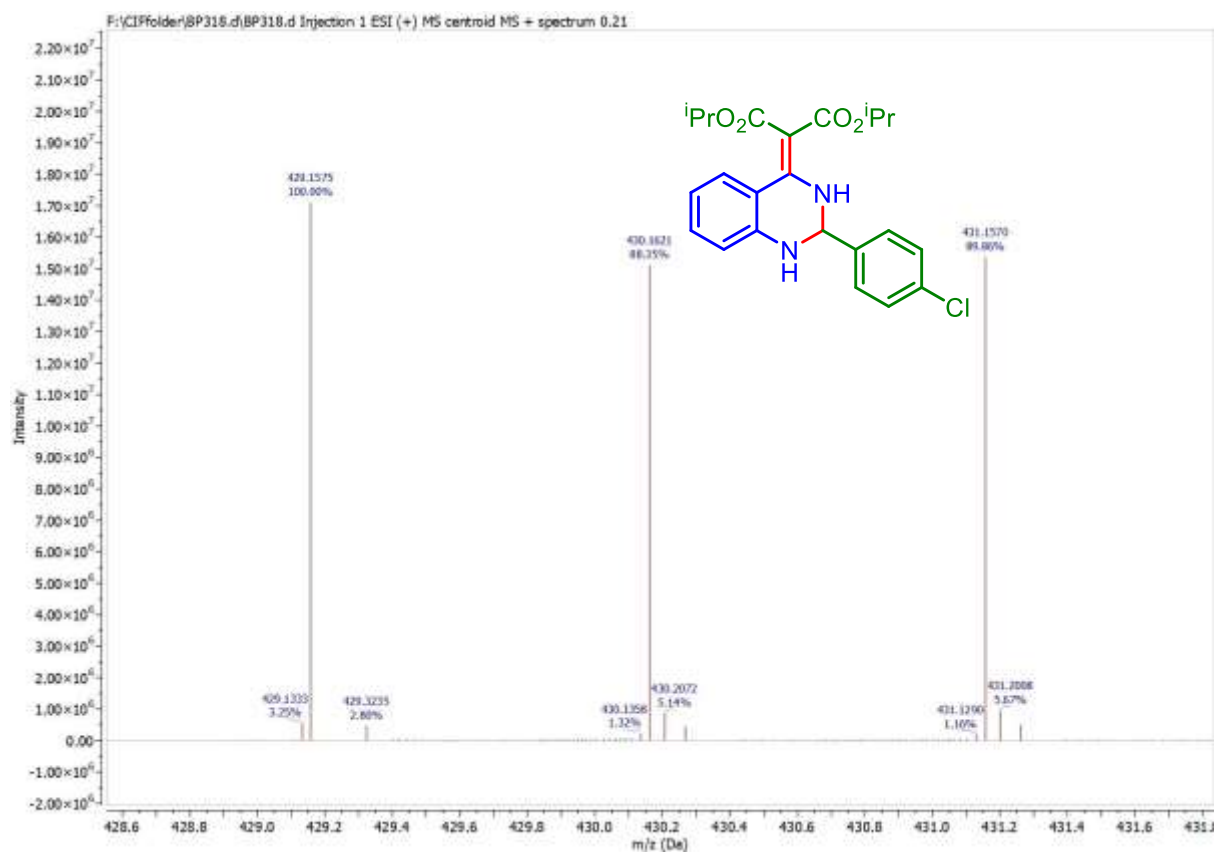

# HRMS spectrum of compound **3at**

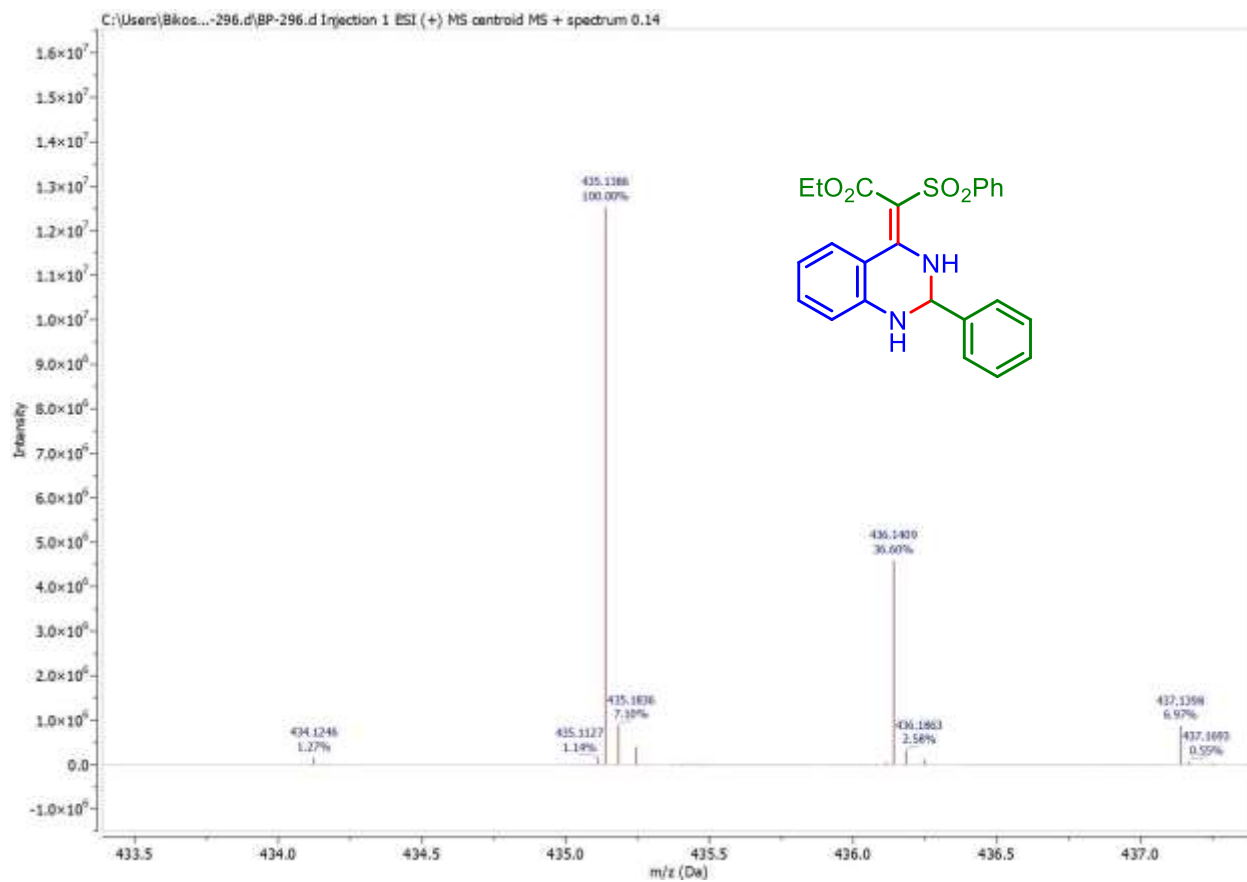

# HRMS spectrum of compound **3bb**

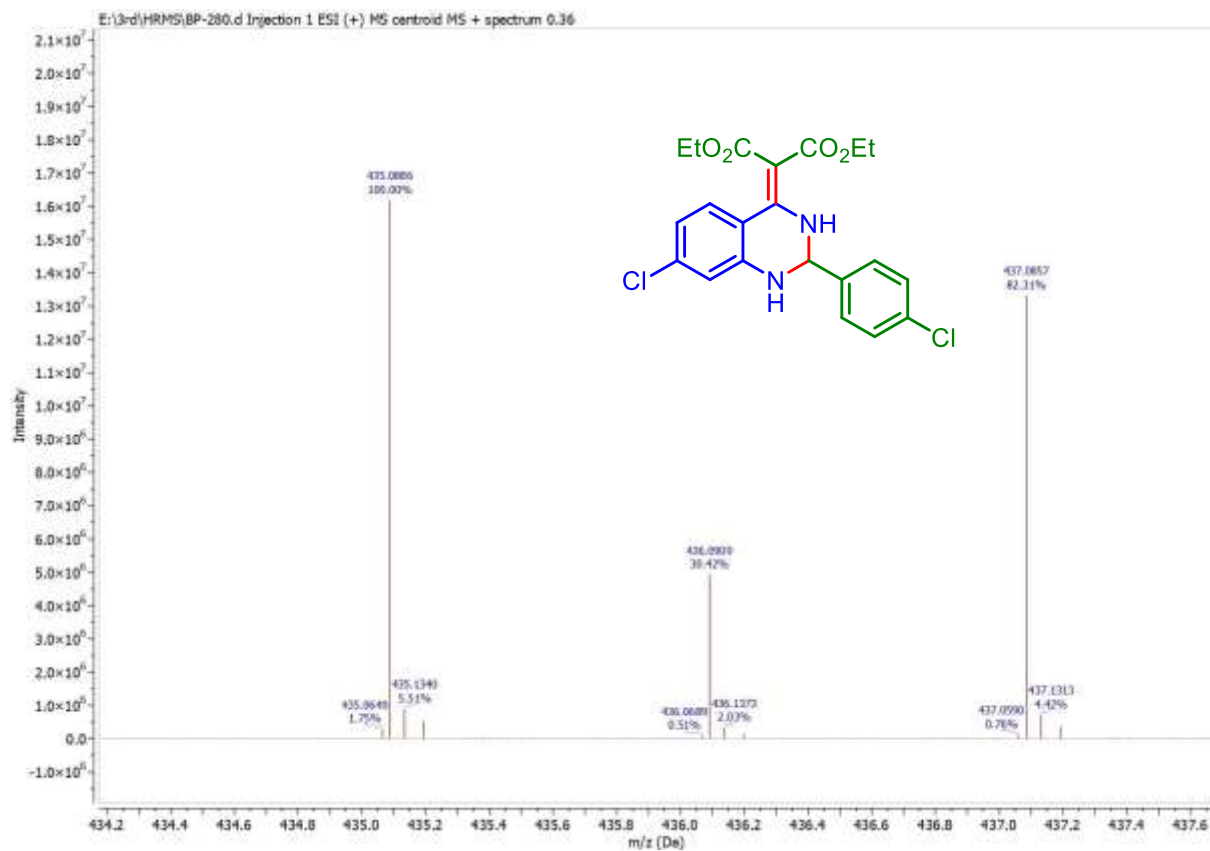

# HRMS spectrum of compound **3cn**

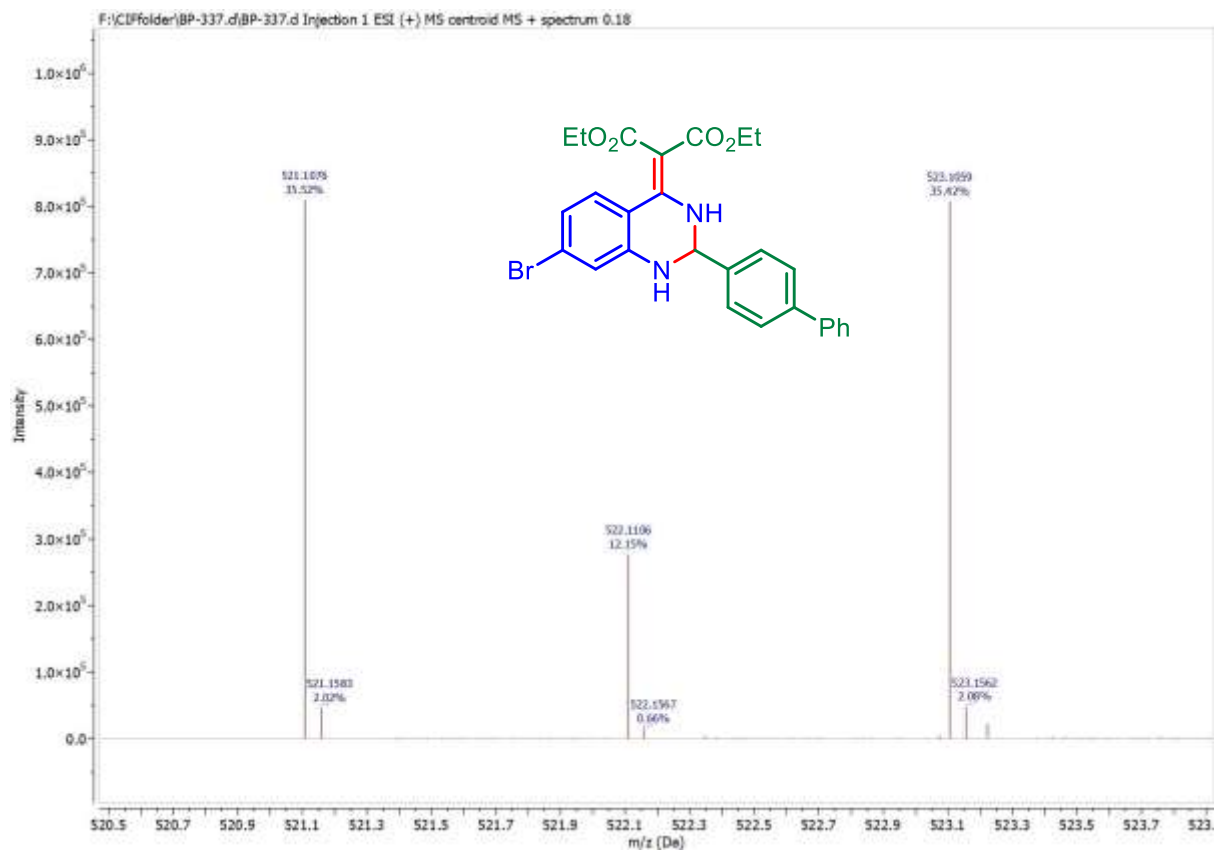

# HRMS spectrum of compound **3db**

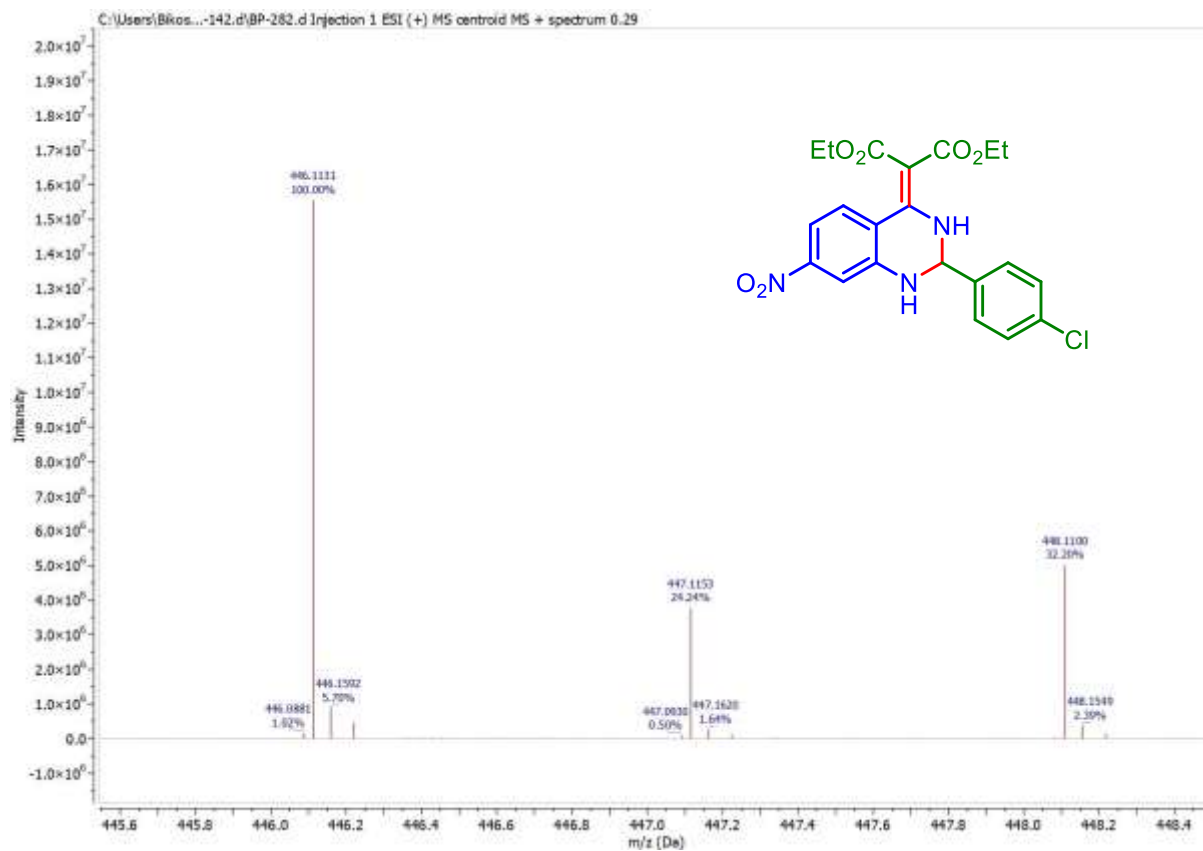



# HRMS spectrum of compound **3ei**

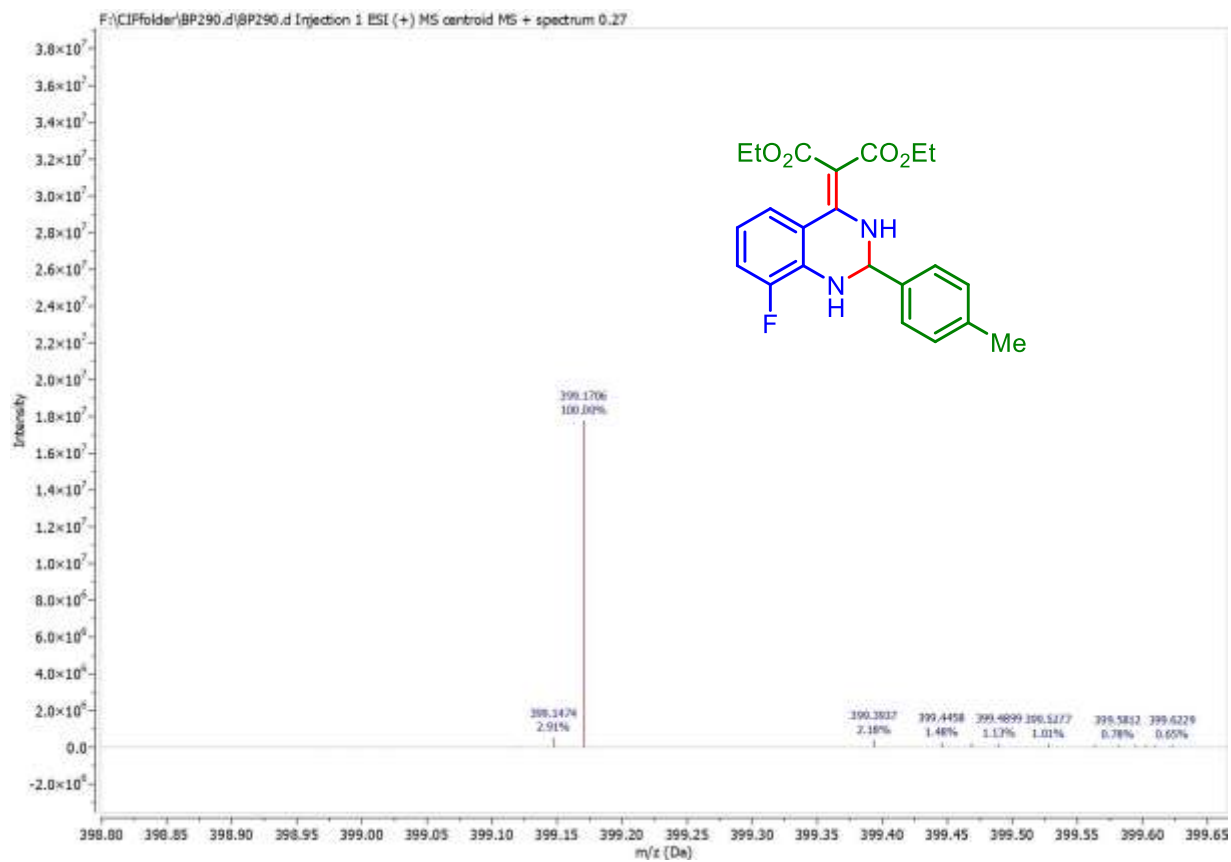

# HRMS spectrum of compound **3fa**

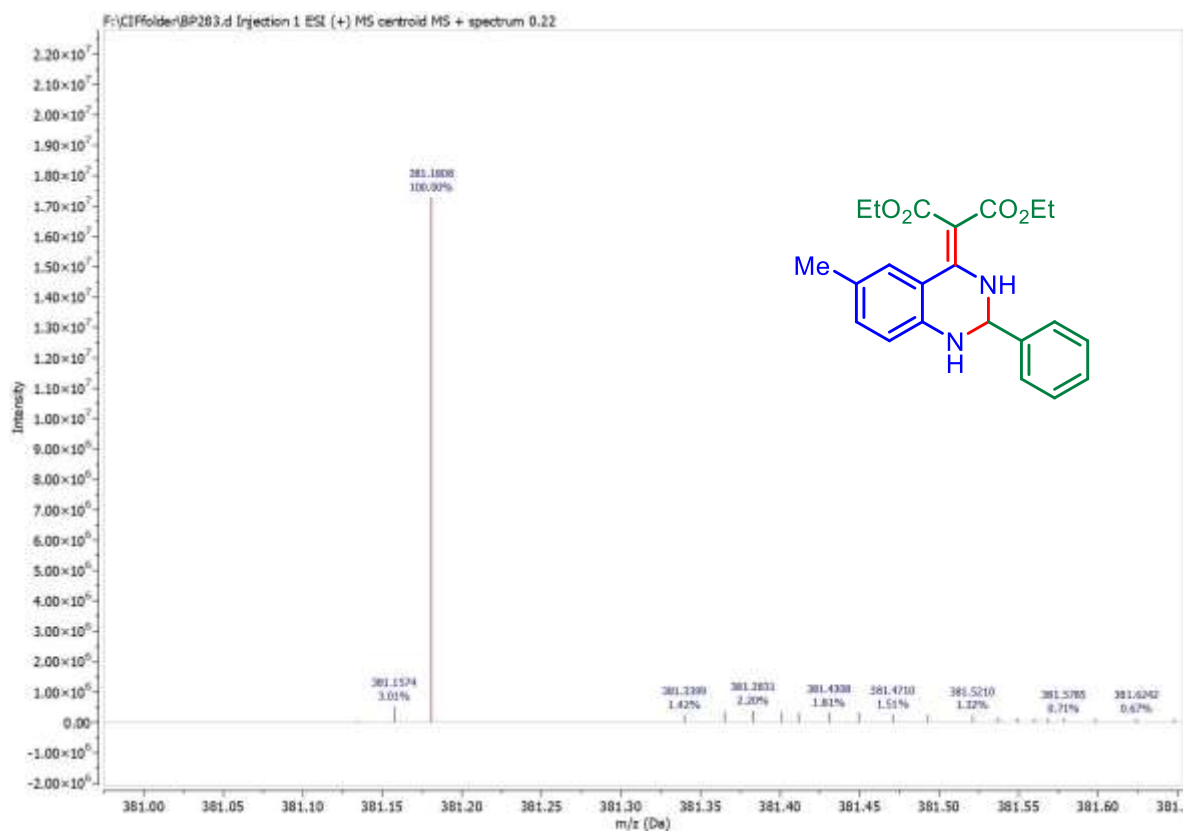

# HRMS spectrum of compound **3fx**

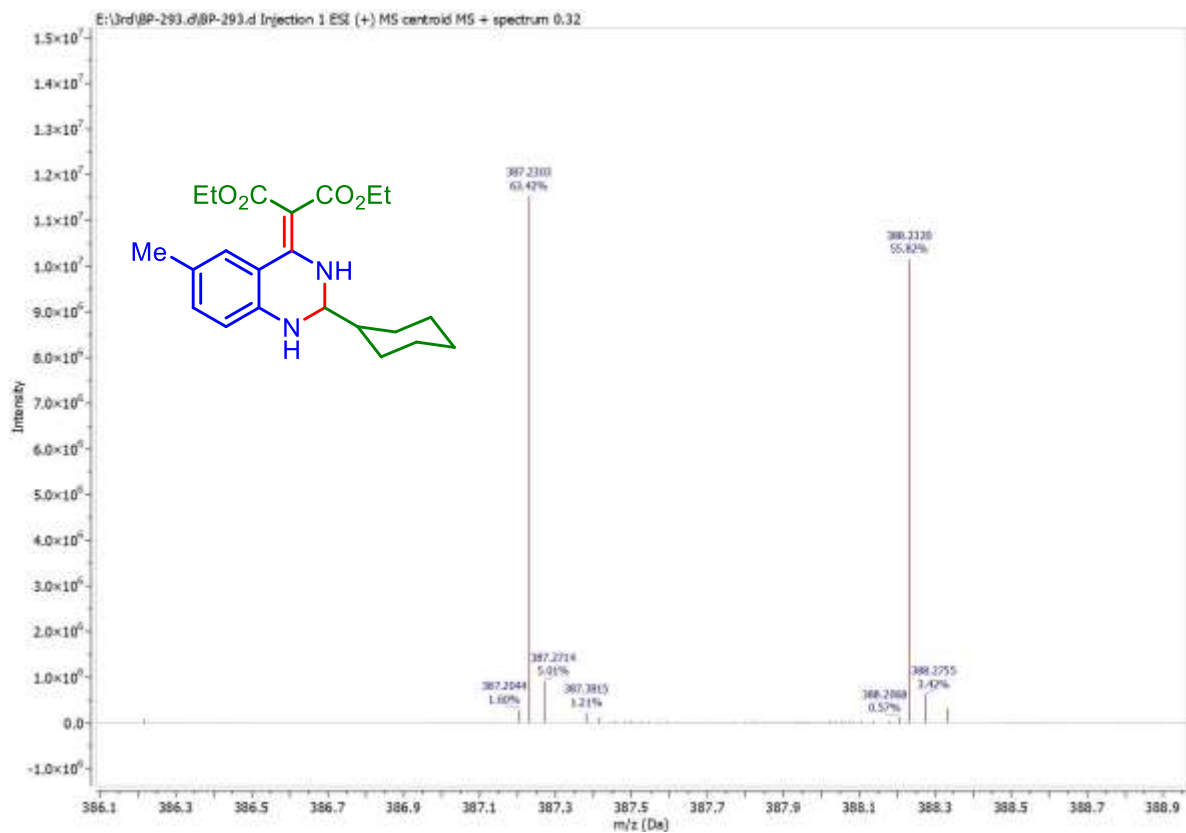

# HRMS spectrum of compound **3gc**

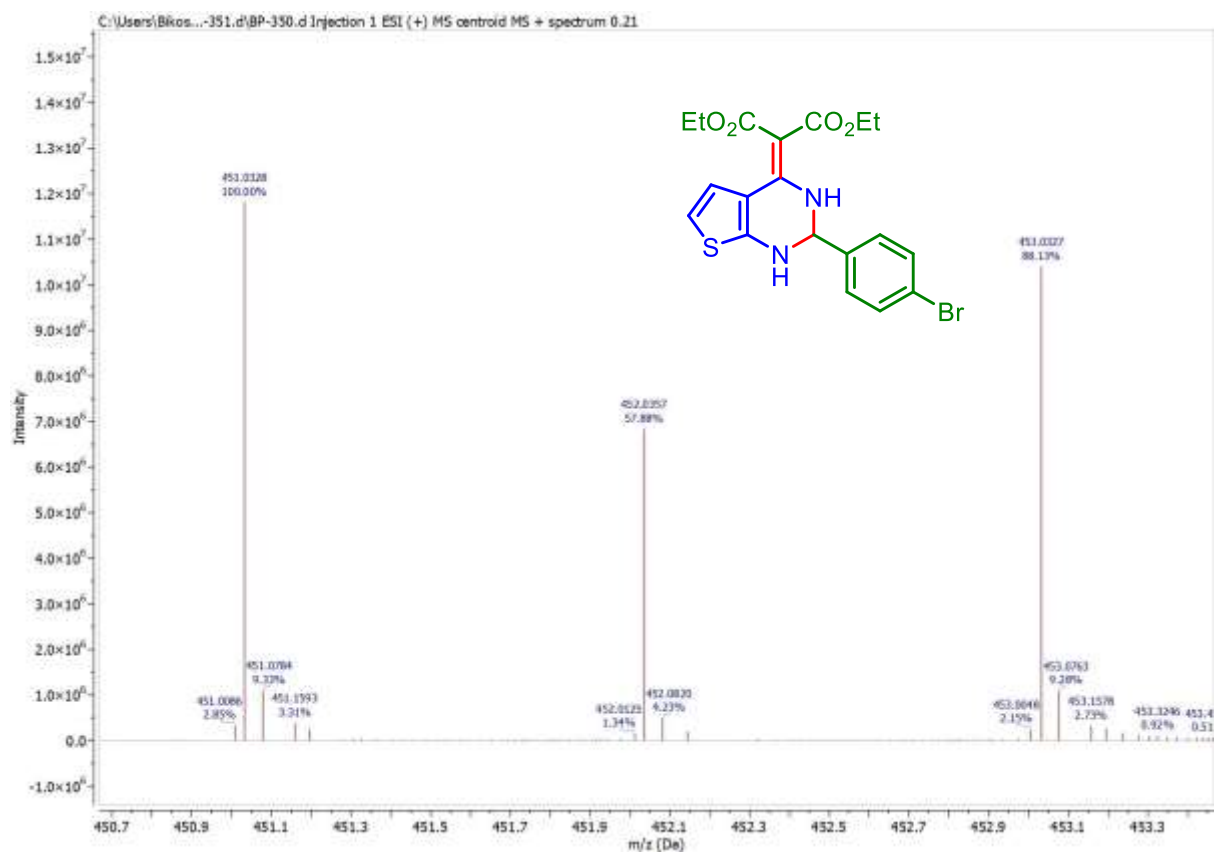

# HRMS spectrum of compound **3hb**

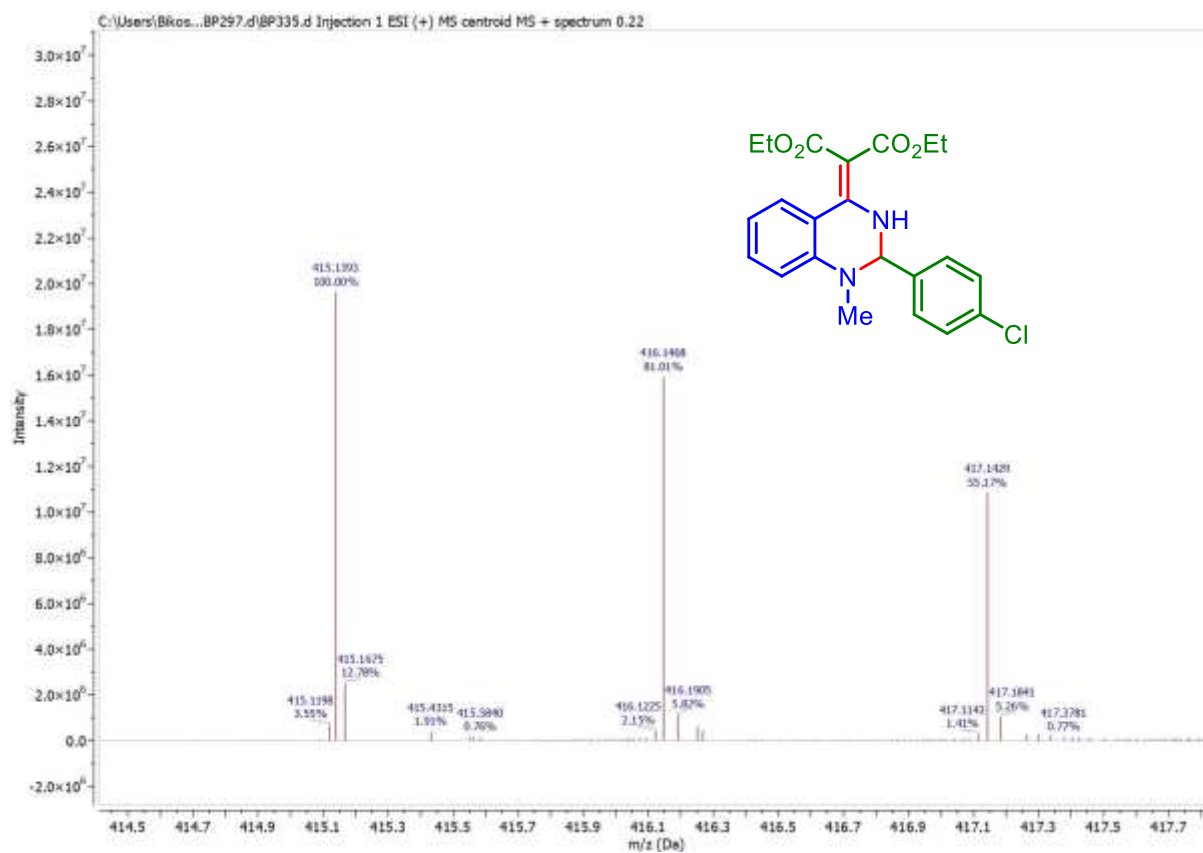

# HRMS spectrum of compound 4a

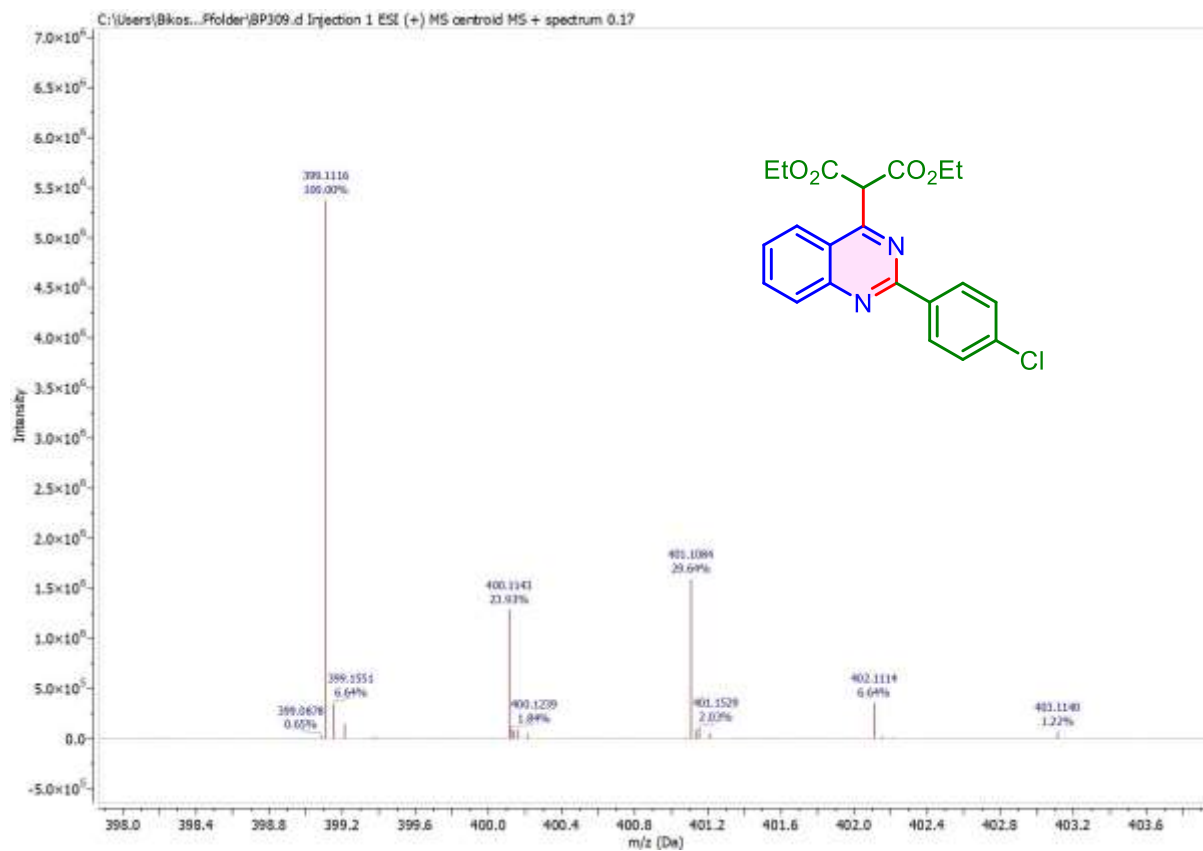

# HRMS spectrum of compound **4b**

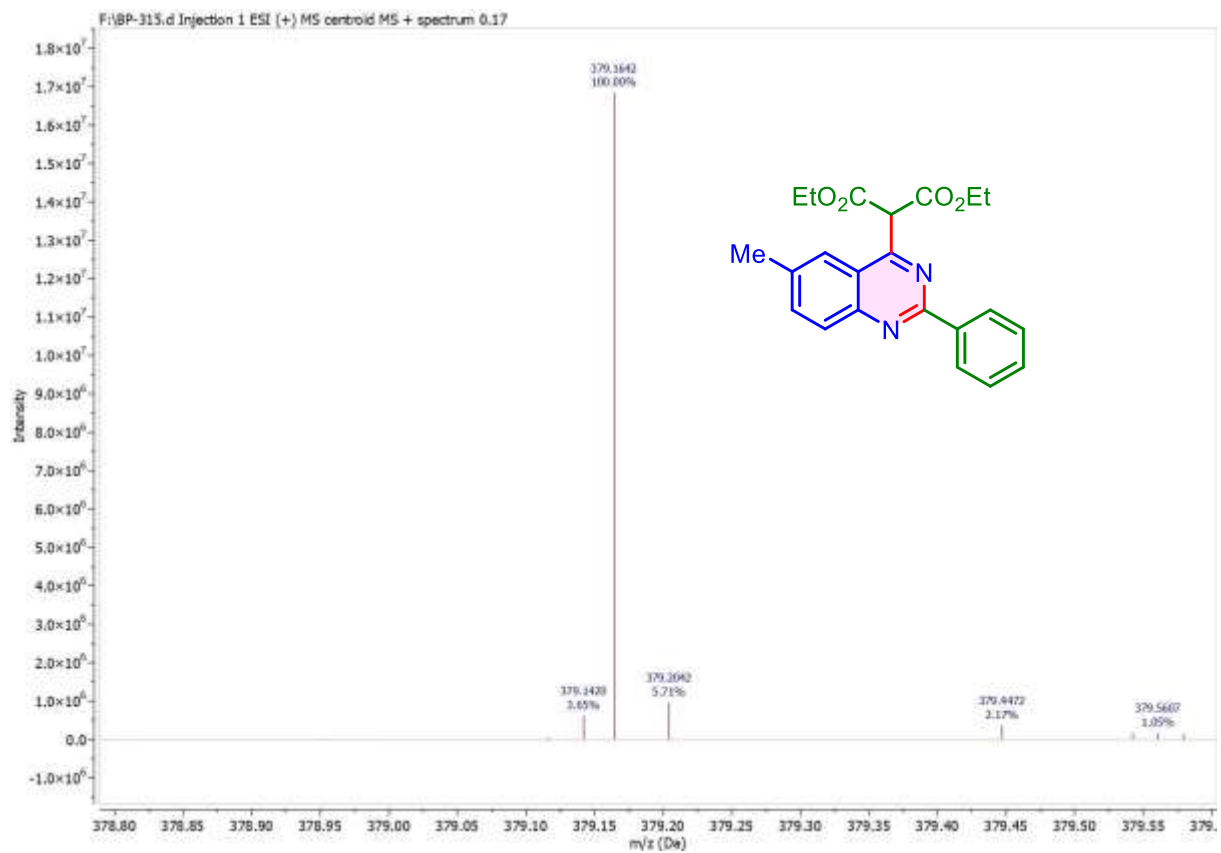

# HRMS spectrum of compound 4c

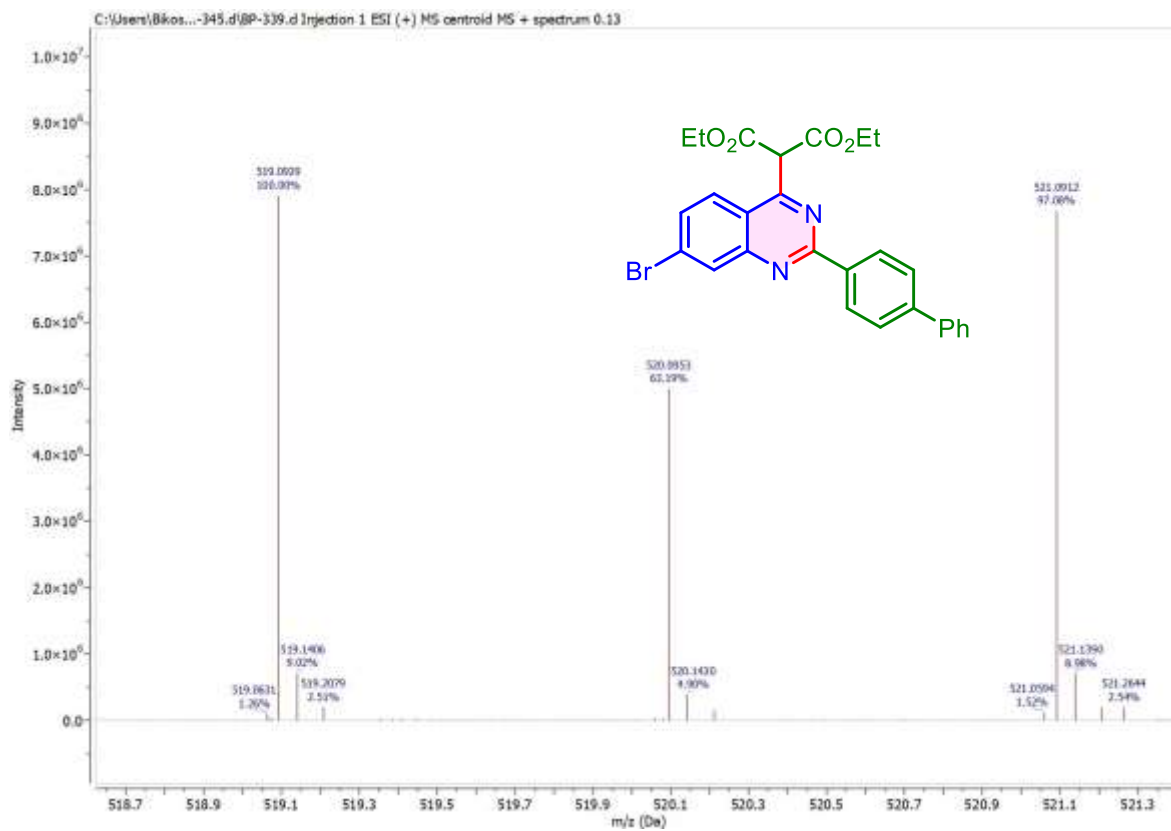



# HRMS spectrum of compound 5a

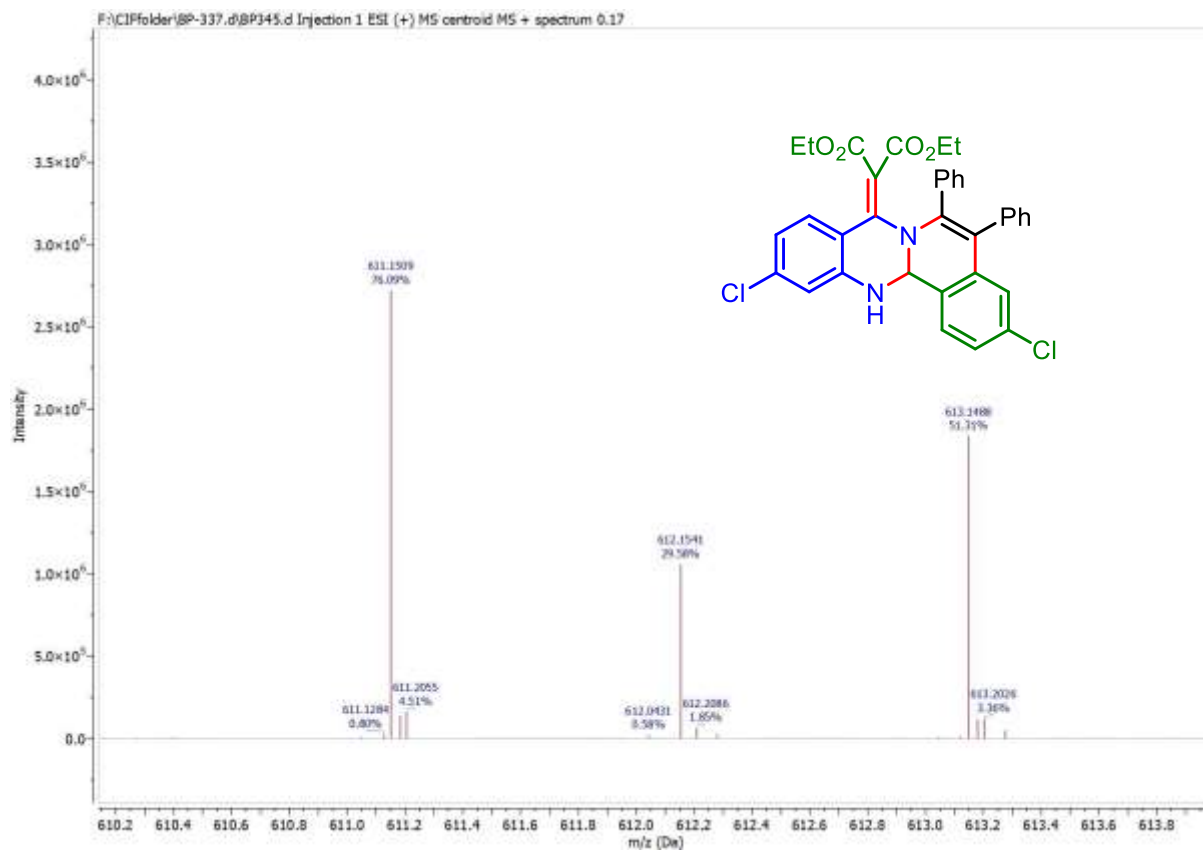

# HRMS spectrum of compound **5b**

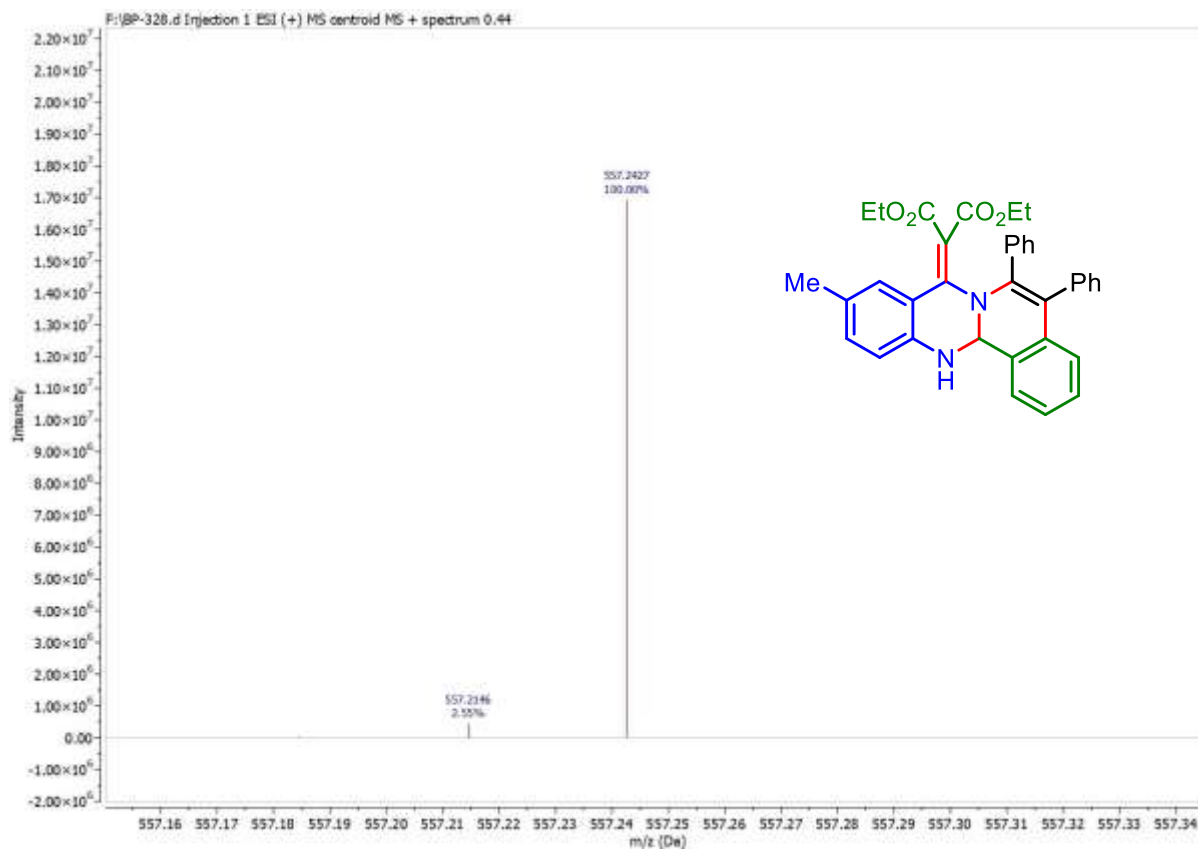

# HRMS spectrum of compound **5c**

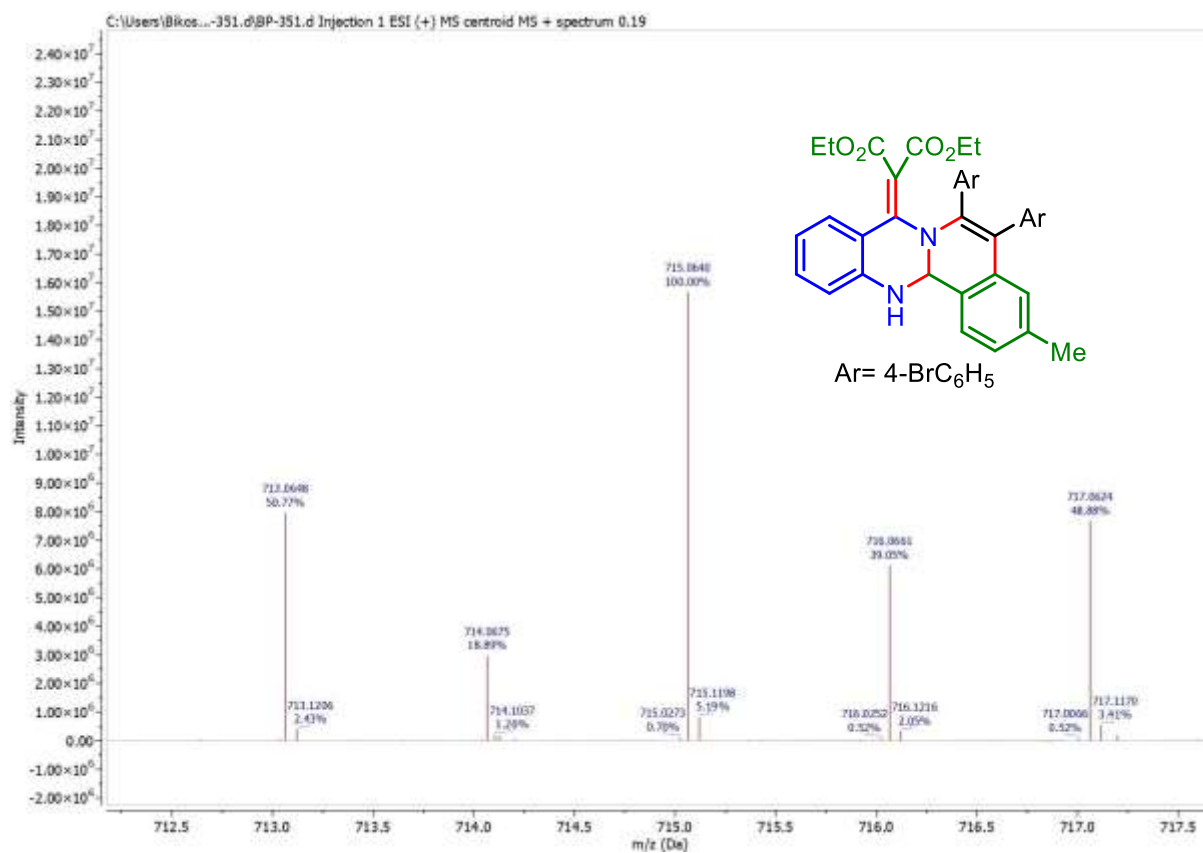

Supplement: d4cc00240g1.pdf [file d4cc00240g1.pdf]
